# Supplementary material
Source: publisher figshare collection journal article supplement (https://acs.figshare.com/ndownloader/files/3915190)
Supplement: Supplementary file 1 [file 3915190]

data_La-TCM 
 
_audit_creation_method            SHELXL-97 
_chemical_name_systematic 
; 
 ? 
; 
_chemical_name_common             ? 
_chemical_melting_point           ? 
_chemical_formula_moiety          ? 
_chemical_formula_sum 
 'C33 H31 La O11' 
_chemical_formula_weight          742.49 
 
loop_ 
 _atom_type_symbol 
 _atom_type_description 
 _atom_type_scat_dispersion_real 
 _atom_type_scat_dispersion_imag 
 _atom_type_scat_source 
 'C'  'C'   0.0033   0.0016 
 'International Tables Vol C Tables 4.2.6.8 and 6.1.1.4' 
 'H'  'H'   0.0000   0.0000 
 'International Tables Vol C Tables 4.2.6.8 and 6.1.1.4' 
 'La'  'La'  -0.2871   2.4523 
 'International Tables Vol C Tables 4.2.6.8 and 6.1.1.4' 
 'O'  'O'   0.0106   0.0060 
 'International Tables Vol C Tables 4.2.6.8 and 6.1.1.4' 
 
_symmetry_cell_setting            'triclinic' 
_symmetry_space_group_name_H-M    'P-1'
 
loop_ 
 _symmetry_equiv_pos_as_xyz 
 'x, y, z' 
 '-x, -y, -z' 
 
_cell_length_a                    9.1684(17) 
_cell_length_b                    13.5704(19) 
_cell_length_c                    17.837(4) 
_cell_angle_alpha                 86.182(14) 
_cell_angle_beta                  87.019(16) 
_cell_angle_gamma                 84.413(13) 
_cell_volume                      2201.5(7) 
_cell_formula_units_Z             2 
_cell_measurement_temperature     293(2) 
_cell_measurement_reflns_used     15054 
_cell_measurement_theta_min       3.04 
_cell_measurement_theta_max       26.37 
 
_exptl_crystal_description        'block' 
_exptl_crystal_colour             'colorless'
_exptl_crystal_size_max           0.39 
_exptl_crystal_size_mid           0.23
_exptl_crystal_size_min           0.12 
_exptl_crystal_density_meas       ? 
_exptl_crystal_density_diffrn     1.120 
_exptl_crystal_density_method     'not measured' 
_exptl_crystal_F_000              748 
_exptl_absorpt_coefficient_mu     1.014 
_exptl_absorpt_correction_type    'empirical' 
_exptl_absorpt_correction_T_min   0.756
_exptl_absorpt_correction_T_max   0.885
_exptl_absorpt_process_details    'CrysAlisPro' 
 
_exptl_special_details 
; 
 ? 
; 
 
_diffrn_ambient_temperature       293(2) 
_diffrn_radiation_wavelength      0.71073 
_diffrn_radiation_type            MoK\a 
_diffrn_radiation_source          'fine-focus sealed tube' 
_diffrn_radiation_monochromator   graphite 
_diffrn_measurement_device_type   'Xcalibur, Atlas, Gemini ultra'
_diffrn_measurement_method        '\w scans' 
_diffrn_detector_area_resol_mean  10.3592
_diffrn_standards_number          none 
_diffrn_standards_interval_count  none
_diffrn_standards_interval_time   none 
_diffrn_standards_decay_%         ? 
_diffrn_reflns_number             15054 
_diffrn_reflns_av_R_equivalents   0.0553 
_diffrn_reflns_av_sigmaI/netI     0.1164 
_diffrn_reflns_limit_h_min        -11 
_diffrn_reflns_limit_h_max        11 
_diffrn_reflns_limit_k_min        -16 
_diffrn_reflns_limit_k_max        16 
_diffrn_reflns_limit_l_min        -22 
_diffrn_reflns_limit_l_max        15 
_diffrn_reflns_theta_min          3.04 
_diffrn_reflns_theta_max          26.37 
_reflns_number_total              8931 
_reflns_number_gt                 6420 
_reflns_threshold_expression      >2sigma(I) 
 
_computing_data_collection        'CrysAlisPro (Oxford Diffraction Ltd., 2010)' 
_computing_cell_refinement        'CrysAlisPro (Oxford Diffraction Ltd., 2010)' 
_computing_data_reduction         'CrysAlisPro (Oxford Diffraction Ltd., 2010)' 
_computing_structure_solution     'SHELXS-97 (Sheldrick, 1990)' 
_computing_structure_refinement   'SHELXL-97 (Sheldrick, 1997)' 
_computing_molecular_graphics     ? 
_computing_publication_material   ? 
 
_refine_special_details 
; 
 Refinement of F^2^ against ALL reflections.  The weighted R-factor wR and 
 goodness of fit S are based on F^2^, conventional R-factors R are based 
 on F, with F set to zero for negative F^2^. The threshold expression of 
 F^2^ > 2sigma(F^2^) is used only for calculating R-factors(gt) etc. and is 
 not relevant to the choice of reflections for refinement.  R-factors based 
 on F^2^ are statistically about twice as large as those based on F, and R- 
 factors based on ALL data will be even larger. 
; 

# SQUEEZE RESULTS (APPEND TO CIF)
# Note: Data are Listed for all Voids in the P1 Unit Cell
# i.e. Centre of Gravity, Solvent Accessible Volume,
# Recovered number of Electrons in the Void and
# Details about the Squeezed Material 
loop_
  _platon_squeeze_void_nr
  _platon_squeeze_void_average_x
  _platon_squeeze_void_average_y
  _platon_squeeze_void_average_z
  _platon_squeeze_void_volume
  _platon_squeeze_void_count_electrons
  _platon_squeeze_void_content
   1 -0.015  0.013 -0.013       881       163 ' '
_platon_squeeze_details
;
;

_refine_ls_structure_factor_coef  Fsqd  
_refine_ls_matrix_type            full 
_refine_ls_weighting_scheme       calc  
_refine_ls_weighting_details 
 'calc w=1/[\s^2^(Fo^2^)+(0.0628P)^2^+0.0000P] where P=(Fo^2^+2Fc^2^)/3' 
_atom_sites_solution_primary      direct 
_atom_sites_solution_secondary    difmap 
_atom_sites_solution_hydrogens    geom 
_refine_ls_hydrogen_treatment     constr 
_refine_ls_extinction_method      none 
_refine_ls_extinction_coef        ? 
_refine_ls_number_reflns          8931 
_refine_ls_number_parameters      406 
_refine_ls_number_restraints      0 
_refine_ls_R_factor_all           0.0882 
_refine_ls_R_factor_gt            0.0609 
_refine_ls_wR_factor_ref          0.1545 
_refine_ls_wR_factor_gt           0.1412 
_refine_ls_goodness_of_fit_ref    1.022 
_refine_ls_restrained_S_all       1.022 
_refine_ls_shift/su_max           0.000 
_refine_ls_shift/su_mean          0.000 
 
loop_ 
 _atom_site_label 
 _atom_site_type_symbol 
 _atom_site_fract_x 
 _atom_site_fract_y 
 _atom_site_fract_z 
 _atom_site_U_iso_or_equiv 
 _atom_site_adp_type 
 _atom_site_occupancy 
 _atom_site_symmetry_multiplicity 
 _atom_site_calc_flag 
 _atom_site_refinement_flags 
 _atom_site_disorder_assembly 
 _atom_site_disorder_group 
La1 La 0.80808(3) 1.05125(3) 0.53499(2) 0.03224(13) Uani 1 1 d . . . 
O1 O 0.8049(4) 0.6709(4) 0.1588(3) 0.0593(15) Uani 1 1 d . . . 
O2 O 0.7138(4) 0.9523(3) 0.4335(3) 0.0422(11) Uani 1 1 d . . . 
O3 O 0.9501(4) 0.9534(3) 0.4074(3) 0.0456(11) Uani 1 1 d . . . 
O4 O 0.8158(4) 0.5758(4) -0.1700(3) 0.0513(12) Uani 1 1 d . . . 
O5 O 1.1733(5) 0.8238(3) -0.4208(3) 0.0526(12) Uani 1 1 d . . . 
O6 O 0.9463(5) 0.8766(3) -0.4462(3) 0.0493(11) Uani 1 1 d . . . 
O7 O 0.6630(4) 0.2545(3) 0.1089(3) 0.0512(12) Uani 1 1 d . . . 
O8 O 0.2714(5) -0.0302(4) 0.3190(3) 0.0565(13) Uani 1 1 d . . . 
O9 O 0.3869(4) 0.0479(4) 0.3988(3) 0.0525(12) Uani 1 1 d . . . 
O10 O 0.7839(6) 1.2230(4) 0.5829(3) 0.0774(17) Uani 1 1 d . . . 
H10C H 0.7766 1.2752 0.5523 0.093 Uiso 1 1 d . . . 
H10D H 0.7827 1.2320 0.6301 0.093 Uiso 1 1 d . . . 
O11 O 0.5451(4) 1.1283(4) 0.5063(3) 0.0552(13) Uani 1 1 d . . . 
H11A H 0.5024 1.1124 0.4679 0.066 Uiso 1 1 d . . . 
H11B H 0.4991 1.1703 0.5350 0.066 Uiso 1 1 d . . . 
C1 C 0.6993(6) 0.5740(5) 0.0729(4) 0.0424(16) Uani 1 1 d . . . 
C2 C 0.7849(6) 0.5896(4) 0.0060(4) 0.0384(14) Uani 1 1 d . . . 
C3 C 0.8095(6) 0.5127(4) -0.0428(3) 0.0354(14) Uani 1 1 d . . . 
C4 C 0.7417(6) 0.4237(4) -0.0287(3) 0.0354(14) Uani 1 1 d . . . 
C5 C 0.6575(6) 0.4096(4) 0.0375(3) 0.0343(13) Uani 1 1 d . . . 
C6 C 0.6397(6) 0.4840(5) 0.0900(3) 0.0369(14) Uani 1 1 d . . . 
C7 C 0.8437(7) 0.6869(5) -0.0145(5) 0.058(2) Uani 1 1 d . . . 
H7A H 0.9090 0.6812 -0.0582 0.087 Uiso 1 1 calc R . . 
H7B H 0.8961 0.7059 0.0267 0.087 Uiso 1 1 calc R . . 
H7C H 0.7640 0.7363 -0.0251 0.087 Uiso 1 1 calc R . . 
C8 C 0.7624(8) 0.3447(5) -0.0860(4) 0.0574(19) Uani 1 1 d . . . 
H8A H 0.7069 0.2903 -0.0692 0.086 Uiso 1 1 calc R . . 
H8B H 0.8644 0.3213 -0.0913 0.086 Uiso 1 1 calc R . . 
H8C H 0.7288 0.3725 -0.1337 0.086 Uiso 1 1 calc R . . 
C9 C 0.5579(7) 0.4644(6) 0.1645(4) 0.0569(19) Uani 1 1 d . . . 
H9A H 0.5272 0.3986 0.1673 0.085 Uiso 1 1 calc R . . 
H9B H 0.4734 0.5117 0.1688 0.085 Uiso 1 1 calc R . . 
H9C H 0.6212 0.4706 0.2049 0.085 Uiso 1 1 calc R . . 
C10 C 0.6684(6) 0.6570(5) 0.1257(4) 0.052(2) Uani 1 1 d . . . 
H10A H 0.6311 0.7175 0.0983 0.062 Uiso 1 1 calc R . . 
H10B H 0.5958 0.6397 0.1646 0.062 Uiso 1 1 calc R . . 
C11 C 0.7996(6) 0.7369(5) 0.2135(4) 0.0465(18) Uani 1 1 d . . . 
C12 C 0.6717(6) 0.7801(5) 0.2484(4) 0.0427(16) Uani 1 1 d . . . 
H12A H 0.5801 0.7677 0.2332 0.051 Uiso 1 1 calc R . . 
C13 C 0.6833(6) 0.8421(5) 0.3064(4) 0.0413(16) Uani 1 1 d . . . 
H13A H 0.5981 0.8704 0.3300 0.050 Uiso 1 1 calc R . . 
C14 C 0.8158(5) 0.8627(5) 0.3297(4) 0.0381(15) Uani 1 1 d . . . 
C15 C 0.9430(6) 0.8239(6) 0.2920(4) 0.058(2) Uani 1 1 d . . . 
H15A H 1.0336 0.8411 0.3051 0.070 Uiso 1 1 calc R . . 
C16 C 0.9363(7) 0.7599(6) 0.2351(4) 0.062(2) Uani 1 1 d . . . 
H16A H 1.0220 0.7323 0.2115 0.075 Uiso 1 1 calc R . . 
C17 C 0.8257(6) 0.9263(4) 0.3947(4) 0.0391(15) Uani 1 1 d . . . 
C18 C 0.9080(6) 0.5277(5) -0.1129(4) 0.0437(15) Uani 1 1 d . . . 
H18A H 0.9849 0.5688 -0.1031 0.052 Uiso 1 1 calc R . . 
H18B H 0.9531 0.4644 -0.1289 0.052 Uiso 1 1 calc R . . 
C19 C 0.8793(6) 0.6296(5) -0.2290(4) 0.0413(15) Uani 1 1 d . . . 
C20 C 1.0304(6) 0.6259(5) -0.2470(4) 0.0458(16) Uani 1 1 d . . . 
H20A H 1.0964 0.5835 -0.2195 0.055 Uiso 1 1 calc R . . 
C21 C 1.0787(6) 0.6862(5) -0.3059(4) 0.0426(15) Uani 1 1 d . . . 
H21A H 1.1790 0.6844 -0.3174 0.051 Uiso 1 1 calc R . . 
C22 C 0.9835(6) 0.7499(4) -0.3492(4) 0.0383(14) Uani 1 1 d . . . 
C23 C 0.8335(7) 0.7465(5) -0.3334(4) 0.0459(16) Uani 1 1 d . . . 
H23A H 0.7669 0.7850 -0.3632 0.055 Uiso 1 1 calc R . . 
C24 C 0.7822(6) 0.6865(5) -0.2739(4) 0.0458(16) Uani 1 1 d . . . 
H24A H 0.6818 0.6848 -0.2643 0.055 Uiso 1 1 calc R . . 
C25 C 1.0370(7) 0.8210(5) -0.4084(4) 0.0394(14) Uani 1 1 d . . . 
C26 C 0.5806(6) 0.3181(5) 0.0548(4) 0.0416(15) Uani 1 1 d . . . 
H26A H 0.4821 0.3356 0.0753 0.050 Uiso 1 1 calc R . . 
H26B H 0.5735 0.2839 0.0093 0.050 Uiso 1 1 calc R . . 
C27 C 0.5865(6) 0.1949(5) 0.1588(4) 0.0406(15) Uani 1 1 d . . . 
C28 C 0.4649(6) 0.1518(5) 0.1417(4) 0.0455(16) Uani 1 1 d . . . 
H28A H 0.4289 0.1612 0.0937 0.055 Uiso 1 1 calc R . . 
C29 C 0.3957(6) 0.0939(5) 0.1970(4) 0.0431(15) Uani 1 1 d . . . 
H29A H 0.3134 0.0638 0.1855 0.052 Uiso 1 1 calc R . . 
C30 C 0.4477(6) 0.0800(5) 0.2699(4) 0.0404(15) Uani 1 1 d . . . 
C31 C 0.5716(6) 0.1226(5) 0.2845(4) 0.0489(17) Uani 1 1 d . . . 
H31A H 0.6084 0.1147 0.3324 0.059 Uiso 1 1 calc R . . 
C32 C 0.6416(7) 0.1770(6) 0.2286(5) 0.056(2) Uani 1 1 d . . . 
H32A H 0.7288 0.2023 0.2384 0.068 Uiso 1 1 calc R . . 
C33 C 0.3641(6) 0.0285(5) 0.3323(4) 0.0402(15) Uani 1 1 d . . . 
 
loop_ 
 _atom_site_aniso_label 
 _atom_site_aniso_U_11 
 _atom_site_aniso_U_22 
 _atom_site_aniso_U_33 
 _atom_site_aniso_U_23 
 _atom_site_aniso_U_13 
 _atom_site_aniso_U_12 
La1 0.03290(19) 0.0352(2) 0.0292(2) -0.00059(15) -0.00236(13) -0.00667(13) 
O1 0.050(2) 0.075(4) 0.056(3) -0.036(3) -0.014(2) 0.004(2) 
O2 0.040(2) 0.049(3) 0.039(3) -0.015(2) 0.0013(19) -0.0062(18) 
O3 0.042(2) 0.057(3) 0.041(3) -0.003(2) -0.0090(19) -0.0163(19) 
O4 0.046(2) 0.070(3) 0.036(3) 0.022(2) -0.006(2) -0.012(2) 
O5 0.057(3) 0.053(3) 0.045(3) 0.015(2) 0.005(2) -0.009(2) 
O6 0.067(3) 0.040(3) 0.041(3) 0.013(2) -0.014(2) -0.010(2) 
O7 0.046(2) 0.052(3) 0.053(3) 0.017(2) 0.003(2) -0.009(2) 
O8 0.066(3) 0.064(3) 0.044(3) -0.008(3) 0.011(2) -0.034(2) 
O9 0.058(3) 0.069(3) 0.032(3) 0.007(2) -0.009(2) -0.017(2) 
O10 0.117(4) 0.054(3) 0.064(4) 0.004(3) -0.028(3) -0.017(3) 
O11 0.044(2) 0.061(3) 0.060(4) -0.011(3) -0.002(2) 0.005(2) 
C1 0.042(3) 0.047(4) 0.040(4) -0.004(3) -0.009(3) -0.006(3) 
C2 0.044(3) 0.034(4) 0.038(4) 0.002(3) -0.005(3) -0.011(3) 
C3 0.041(3) 0.037(4) 0.027(3) 0.008(3) -0.006(3) -0.004(2) 
C4 0.046(3) 0.035(3) 0.024(3) -0.002(3) -0.003(3) -0.001(2) 
C5 0.039(3) 0.037(3) 0.027(3) 0.005(3) -0.004(2) -0.008(2) 
C6 0.038(3) 0.044(4) 0.029(4) -0.001(3) -0.003(3) -0.003(3) 
C7 0.064(4) 0.040(4) 0.073(6) 0.005(4) -0.009(4) -0.022(3) 
C8 0.081(5) 0.056(5) 0.038(4) -0.011(4) 0.007(4) -0.017(4) 
C9 0.064(4) 0.066(5) 0.042(5) -0.015(4) 0.009(3) -0.014(3) 
C10 0.051(3) 0.050(4) 0.057(5) -0.026(4) -0.018(3) 0.004(3) 
C11 0.045(3) 0.054(4) 0.042(4) -0.025(4) -0.007(3) 0.004(3) 
C12 0.034(3) 0.053(4) 0.043(4) -0.013(3) -0.008(3) -0.006(3) 
C13 0.039(3) 0.046(4) 0.039(4) -0.012(3) -0.004(3) -0.001(3) 
C14 0.034(3) 0.047(4) 0.034(4) -0.010(3) -0.001(3) -0.005(2) 
C15 0.042(3) 0.085(6) 0.052(5) -0.035(4) -0.015(3) 0.001(3) 
C16 0.043(3) 0.092(6) 0.053(5) -0.035(5) -0.001(3) 0.009(3) 
C17 0.054(4) 0.036(4) 0.030(4) -0.002(3) -0.010(3) -0.010(3) 
C18 0.046(3) 0.052(4) 0.032(4) 0.009(3) -0.003(3) -0.008(3) 
C19 0.050(3) 0.047(4) 0.026(3) 0.007(3) 0.002(3) -0.007(3) 
C20 0.041(3) 0.055(4) 0.040(4) 0.017(3) -0.008(3) -0.012(3) 
C21 0.042(3) 0.045(4) 0.040(4) 0.006(3) -0.005(3) -0.009(3) 
C22 0.046(3) 0.036(4) 0.033(4) 0.001(3) -0.004(3) -0.006(3) 
C23 0.050(3) 0.048(4) 0.037(4) 0.013(3) -0.001(3) -0.001(3) 
C24 0.039(3) 0.048(4) 0.049(4) 0.003(3) 0.003(3) -0.005(3) 
C25 0.052(4) 0.036(4) 0.031(4) 0.000(3) 0.000(3) -0.010(3) 
C26 0.046(3) 0.042(4) 0.037(4) 0.009(3) -0.005(3) -0.014(3) 
C27 0.036(3) 0.040(4) 0.044(4) 0.011(3) 0.001(3) -0.006(3) 
C28 0.050(3) 0.048(4) 0.039(4) 0.007(3) -0.001(3) -0.012(3) 
C29 0.040(3) 0.050(4) 0.040(4) 0.006(3) -0.003(3) -0.012(3) 
C30 0.042(3) 0.041(4) 0.036(4) 0.012(3) 0.001(3) -0.003(3) 
C31 0.039(3) 0.059(5) 0.049(5) 0.012(4) -0.012(3) -0.014(3) 
C32 0.043(3) 0.062(5) 0.066(6) 0.005(4) -0.005(3) -0.023(3) 
C33 0.034(3) 0.042(4) 0.041(4) 0.009(3) 0.003(3) 0.000(3) 
 
_geom_special_details 
; 
 All esds (except the esd in the dihedral angle between two l.s. planes) 
 are estimated using the full covariance matrix.  The cell esds are taken 
 into account individually in the estimation of esds in distances, angles 
 and torsion angles; correlations between esds in cell parameters are only 
 used when they are defined by crystal symmetry.  An approximate (isotropic) 
 treatment of cell esds is used for estimating esds involving l.s. planes. 
; 
 
loop_ 
 _geom_bond_atom_site_label_1 
 _geom_bond_atom_site_label_2 
 _geom_bond_distance 
 _geom_bond_site_symmetry_2 
 _geom_bond_publ_flag 
La1 O3 2.485(4) 2_776 ? 
La1 O9 2.537(5) 2_666 ? 
La1 O10 2.521(5) . ? 
La1 O2 2.557(4) . ? 
La1 O5 2.572(5) 2_775 ? 
La1 O6 2.587(4) 1_556 ? 
La1 O11 2.595(4) . ? 
La1 O8 2.672(5) 2_666 ? 
La1 O6 2.897(5) 2_775 ? 
La1 O3 2.897(4) . ? 
La1 C33 2.978(7) 2_666 ? 
La1 La1 3.8340(9) 2_776 ? 
O1 C11 1.364(7) . ? 
O1 C10 1.445(6) . ? 
O2 C17 1.242(7) . ? 
O3 C17 1.268(6) . ? 
O3 La1 2.485(4) 2_776 ? 
O4 C19 1.376(8) . ? 
O4 C18 1.439(7) . ? 
O5 C25 1.261(7) . ? 
O5 La1 2.572(5) 2_775 ? 
O6 C25 1.258(7) . ? 
O6 La1 2.587(4) 1_554 ? 
O6 La1 2.897(5) 2_775 ? 
O7 C27 1.373(8) . ? 
O7 C26 1.443(8) . ? 
O8 C33 1.261(7) . ? 
O8 La1 2.672(5) 2_666 ? 
O9 C33 1.264(7) . ? 
O9 La1 2.537(5) 2_666 ? 
O10 H10C 0.8639 . ? 
O10 H10D 0.8593 . ? 
O11 H11A 0.8574 . ? 
O11 H11B 0.8560 . ? 
C1 C6 1.395(9) . ? 
C1 C2 1.409(9) . ? 
C1 C10 1.513(8) . ? 
C2 C3 1.398(8) . ? 
C2 C7 1.491(9) . ? 
C3 C4 1.413(8) . ? 
C3 C18 1.518(9) . ? 
C4 C5 1.389(8) . ? 
C4 C8 1.523(8) . ? 
C5 C6 1.416(8) . ? 
C5 C26 1.493(8) . ? 
C6 C9 1.513(9) . ? 
C7 H7A 0.9600 . ? 
C7 H7B 0.9600 . ? 
C7 H7C 0.9600 . ? 
C8 H8A 0.9600 . ? 
C8 H8B 0.9600 . ? 
C8 H8C 0.9600 . ? 
C9 H9A 0.9600 . ? 
C9 H9B 0.9600 . ? 
C9 H9C 0.9600 . ? 
C10 H10A 0.9700 . ? 
C10 H10B 0.9700 . ? 
C11 C12 1.395(8) . ? 
C11 C16 1.399(8) . ? 
C12 C13 1.390(8) . ? 
C12 H12A 0.9300 . ? 
C13 C14 1.363(7) . ? 
C13 H13A 0.9300 . ? 
C14 C15 1.391(8) . ? 
C14 C17 1.504(8) . ? 
C15 C16 1.387(8) . ? 
C15 H15A 0.9300 . ? 
C16 H16A 0.9300 . ? 
C18 H18A 0.9700 . ? 
C18 H18B 0.9700 . ? 
C19 C24 1.375(9) . ? 
C19 C20 1.402(8) . ? 
C20 C21 1.370(9) . ? 
C20 H20A 0.9300 . ? 
C21 C22 1.393(8) . ? 
C21 H21A 0.9300 . ? 
C22 C23 1.394(8) . ? 
C22 C25 1.479(9) . ? 
C23 C24 1.384(10) . ? 
C23 H23A 0.9300 . ? 
C24 H24A 0.9300 . ? 
C26 H26A 0.9700 . ? 
C26 H26B 0.9700 . ? 
C27 C32 1.366(10) . ? 
C27 C28 1.365(8) . ? 
C28 C29 1.386(9) . ? 
C28 H28A 0.9300 . ? 
C29 C30 1.404(9) . ? 
C29 H29A 0.9300 . ? 
C30 C31 1.368(8) . ? 
C30 C33 1.493(9) . ? 
C31 C32 1.370(10) . ? 
C31 H31A 0.9300 . ? 
C32 H32A 0.9300 . ? 
C33 La1 2.978(7) 2_666 ? 
 
loop_ 
 _geom_angle_atom_site_label_1 
 _geom_angle_atom_site_label_2 
 _geom_angle_atom_site_label_3 
 _geom_angle 
 _geom_angle_site_symmetry_1 
 _geom_angle_site_symmetry_3 
 _geom_angle_publ_flag 
O3 La1 O9 118.41(15) 2_776 2_666 ? 
O3 La1 O10 80.96(15) 2_776 . ? 
O9 La1 O10 109.10(18) 2_666 . ? 
O3 La1 O2 132.74(13) 2_776 . ? 
O9 La1 O2 74.52(14) 2_666 . ? 
O10 La1 O2 141.23(15) . . ? 
O3 La1 O5 104.10(15) 2_776 2_775 ? 
O9 La1 O5 137.29(14) 2_666 2_775 ? 
O10 La1 O5 72.16(17) . 2_775 ? 
O2 La1 O5 79.91(15) . 2_775 ? 
O3 La1 O6 64.88(13) 2_776 1_556 ? 
O9 La1 O6 77.71(15) 2_666 1_556 ? 
O10 La1 O6 143.04(15) . 1_556 ? 
O2 La1 O6 75.68(13) . 1_556 ? 
O5 La1 O6 127.91(15) 2_775 1_556 ? 
O3 La1 O11 154.28(14) 2_776 . ? 
O9 La1 O11 68.07(16) 2_666 . ? 
O10 La1 O11 73.61(15) . . ? 
O2 La1 O11 72.46(13) . . ? 
O5 La1 O11 71.91(15) 2_775 . ? 
O6 La1 O11 138.06(14) 1_556 . ? 
O3 La1 O8 79.14(14) 2_776 2_666 ? 
O9 La1 O8 49.91(13) 2_666 2_666 ? 
O10 La1 O8 73.73(18) . 2_666 ? 
O2 La1 O8 124.08(14) . 2_666 ? 
O5 La1 O8 144.68(15) 2_775 2_666 ? 
O6 La1 O8 85.83(15) 1_556 2_666 ? 
O11 La1 O8 89.96(15) . 2_666 ? 
O3 La1 O6 60.80(14) 2_776 2_775 ? 
O9 La1 O6 167.48(14) 2_666 2_775 ? 
O10 La1 O6 83.33(17) . 2_775 ? 
O2 La1 O6 96.88(13) . 2_775 ? 
O5 La1 O6 46.83(13) 2_775 2_775 ? 
O6 La1 O6 91.47(14) 1_556 2_775 ? 
O11 La1 O6 118.61(15) . 2_775 ? 
O8 La1 O6 136.49(12) 2_666 2_775 ? 
O3 La1 O3 89.47(12) 2_776 . ? 
O9 La1 O3 112.21(13) 2_666 . ? 
O10 La1 O3 137.06(18) . . ? 
O2 La1 O3 46.91(11) . . ? 
O5 La1 O3 69.86(14) 2_775 . ? 
O6 La1 O3 59.78(14) 1_556 . ? 
O11 La1 O3 111.74(13) . . ? 
O8 La1 O3 145.27(15) 2_666 . ? 
O6 La1 O3 56.04(12) 2_775 . ? 
O3 La1 C33 98.70(16) 2_776 2_666 ? 
O9 La1 C33 24.88(14) 2_666 2_666 ? 
O10 La1 C33 92.10(19) . 2_666 ? 
O2 La1 C33 99.14(16) . 2_666 ? 
O5 La1 C33 149.56(15) 2_775 2_666 ? 
O6 La1 C33 80.14(16) 1_556 2_666 ? 
O11 La1 C33 78.77(16) . 2_666 ? 
O8 La1 C33 25.05(14) 2_666 2_666 ? 
O6 La1 C33 159.42(14) 2_775 2_666 ? 
O3 La1 C33 130.80(15) . 2_666 ? 
O3 La1 La1 49.08(10) 2_776 2_776 ? 
O9 La1 La1 126.43(11) 2_666 2_776 ? 
O10 La1 La1 116.83(14) . 2_776 ? 
O2 La1 La1 85.62(9) . 2_776 ? 
O5 La1 La1 84.13(10) 2_775 2_776 ? 
O6 La1 La1 49.05(11) 1_556 2_776 ? 
O11 La1 La1 149.74(11) . 2_776 ? 
O8 La1 La1 119.93(11) 2_666 2_776 ? 
O6 La1 La1 42.42(9) 2_775 2_776 ? 
O3 La1 La1 40.39(7) . 2_776 ? 
C33 La1 La1 126.28(11) 2_666 2_776 ? 
C11 O1 C10 117.2(4) . . ? 
C17 O2 La1 104.1(3) . . ? 
C17 O3 La1 158.0(4) . 2_776 ? 
C17 O3 La1 87.1(3) . . ? 
La1 O3 La1 90.53(12) 2_776 . ? 
C19 O4 C18 118.8(4) . . ? 
C25 O5 La1 103.8(4) . 2_775 ? 
C25 O6 La1 146.6(4) . 1_554 ? 
C25 O6 La1 88.2(4) . 2_775 ? 
La1 O6 La1 88.53(14) 1_554 2_775 ? 
C27 O7 C26 117.7(4) . . ? 
C33 O8 La1 91.1(4) . 2_666 ? 
C33 O9 La1 97.5(4) . 2_666 ? 
La1 O10 H10C 121.1 . . ? 
La1 O10 H10D 121.5 . . ? 
H10C O10 H10D 117.4 . . ? 
La1 O11 H11A 120.7 . . ? 
La1 O11 H11B 120.8 . . ? 
H11A O11 H11B 118.5 . . ? 
C6 C1 C2 120.9(6) . . ? 
C6 C1 C10 119.7(6) . . ? 
C2 C1 C10 119.5(6) . . ? 
C3 C2 C1 118.5(6) . . ? 
C3 C2 C7 120.1(6) . . ? 
C1 C2 C7 121.3(6) . . ? 
C2 C3 C4 121.1(6) . . ? 
C2 C3 C18 118.5(6) . . ? 
C4 C3 C18 120.4(5) . . ? 
C5 C4 C3 119.5(5) . . ? 
C5 C4 C8 121.0(6) . . ? 
C3 C4 C8 119.6(6) . . ? 
C4 C5 C6 120.0(6) . . ? 
C4 C5 C26 122.0(5) . . ? 
C6 C5 C26 118.0(6) . . ? 
C1 C6 C5 119.7(6) . . ? 
C1 C6 C9 120.8(6) . . ? 
C5 C6 C9 119.5(6) . . ? 
C2 C7 H7A 109.5 . . ? 
C2 C7 H7B 109.5 . . ? 
H7A C7 H7B 109.5 . . ? 
C2 C7 H7C 109.5 . . ? 
H7A C7 H7C 109.5 . . ? 
H7B C7 H7C 109.5 . . ? 
C4 C8 H8A 109.5 . . ? 
C4 C8 H8B 109.5 . . ? 
H8A C8 H8B 109.5 . . ? 
C4 C8 H8C 109.5 . . ? 
H8A C8 H8C 109.5 . . ? 
H8B C8 H8C 109.5 . . ? 
C6 C9 H9A 109.5 . . ? 
C6 C9 H9B 109.5 . . ? 
H9A C9 H9B 109.5 . . ? 
C6 C9 H9C 109.5 . . ? 
H9A C9 H9C 109.5 . . ? 
H9B C9 H9C 109.5 . . ? 
O1 C10 C1 107.4(4) . . ? 
O1 C10 H10A 110.2 . . ? 
C1 C10 H10A 110.2 . . ? 
O1 C10 H10B 110.2 . . ? 
C1 C10 H10B 110.2 . . ? 
H10A C10 H10B 108.5 . . ? 
O1 C11 C12 125.3(5) . . ? 
O1 C11 C16 115.0(5) . . ? 
C12 C11 C16 119.6(5) . . ? 
C13 C12 C11 118.9(5) . . ? 
C13 C12 H12A 120.5 . . ? 
C11 C12 H12A 120.5 . . ? 
C14 C13 C12 122.1(5) . . ? 
C14 C13 H13A 119.0 . . ? 
C12 C13 H13A 119.0 . . ? 
C13 C14 C15 118.9(5) . . ? 
C13 C14 C17 121.1(5) . . ? 
C15 C14 C17 120.0(5) . . ? 
C16 C15 C14 120.7(5) . . ? 
C16 C15 H15A 119.6 . . ? 
C14 C15 H15A 119.6 . . ? 
C15 C16 C11 119.6(6) . . ? 
C15 C16 H16A 120.2 . . ? 
C11 C16 H16A 120.2 . . ? 
O2 C17 O3 121.8(5) . . ? 
O2 C17 C14 120.2(5) . . ? 
O3 C17 C14 118.0(5) . . ? 
O4 C18 C3 106.6(4) . . ? 
O4 C18 H18A 110.4 . . ? 
C3 C18 H18A 110.4 . . ? 
O4 C18 H18B 110.4 . . ? 
C3 C18 H18B 110.4 . . ? 
H18A C18 H18B 108.6 . . ? 
C24 C19 O4 115.0(5) . . ? 
C24 C19 C20 120.0(6) . . ? 
O4 C19 C20 125.0(6) . . ? 
C21 C20 C19 118.7(6) . . ? 
C21 C20 H20A 120.7 . . ? 
C19 C20 H20A 120.7 . . ? 
C20 C21 C22 122.6(6) . . ? 
C20 C21 H21A 118.7 . . ? 
C22 C21 H21A 118.7 . . ? 
C21 C22 C23 117.3(6) . . ? 
C21 C22 C25 122.2(5) . . ? 
C23 C22 C25 120.5(6) . . ? 
C24 C23 C22 121.0(6) . . ? 
C24 C23 H23A 119.5 . . ? 
C22 C23 H23A 119.5 . . ? 
C19 C24 C23 120.1(6) . . ? 
C19 C24 H24A 119.9 . . ? 
C23 C24 H24A 119.9 . . ? 
O6 C25 O5 121.1(6) . . ? 
O6 C25 C22 119.7(5) . . ? 
O5 C25 C22 119.3(6) . . ? 
O7 C26 C5 108.5(4) . . ? 
O7 C26 H26A 110.0 . . ? 
C5 C26 H26A 110.0 . . ? 
O7 C26 H26B 110.0 . . ? 
C5 C26 H26B 110.0 . . ? 
H26A C26 H26B 108.4 . . ? 
C32 C27 C28 119.7(7) . . ? 
C32 C27 O7 116.1(5) . . ? 
C28 C27 O7 124.1(6) . . ? 
C27 C28 C29 119.1(6) . . ? 
C27 C28 H28A 120.5 . . ? 
C29 C28 H28A 120.5 . . ? 
C28 C29 C30 121.1(5) . . ? 
C28 C29 H29A 119.5 . . ? 
C30 C29 H29A 119.5 . . ? 
C31 C30 C29 118.3(6) . . ? 
C31 C30 C33 119.9(6) . . ? 
C29 C30 C33 121.6(5) . . ? 
C30 C31 C32 119.9(6) . . ? 
C30 C31 H31A 120.0 . . ? 
C32 C31 H31A 120.0 . . ? 
C27 C32 C31 121.7(6) . . ? 
C27 C32 H32A 119.1 . . ? 
C31 C32 H32A 119.1 . . ? 
O8 C33 O9 121.4(6) . . ? 
O8 C33 C30 121.1(6) . . ? 
O9 C33 C30 117.5(5) . . ? 
O8 C33 La1 63.8(4) . 2_666 ? 
O9 C33 La1 57.7(3) . 2_666 ? 
C30 C33 La1 173.2(4) . 2_666 ? 
 
_diffrn_measured_fraction_theta_max    0.992 
_diffrn_reflns_theta_full              26.37 
_diffrn_measured_fraction_theta_full   0.992 
_refine_diff_density_max    1.758 
_refine_diff_density_min   -1.013 
_refine_diff_density_rms    0.137 


#===END


data_Eu-TCM 
 
_audit_creation_method            SHELXL-97 
_chemical_name_systematic 
; 
 ? 
; 
_chemical_name_common             ? 
_chemical_melting_point           ? 
_chemical_formula_moiety          ? 
_chemical_formula_sum 
 'C33 H31 Eu O11' 
_chemical_formula_weight          755.54 
 
loop_ 
 _atom_type_symbol 
 _atom_type_description 
 _atom_type_scat_dispersion_real 
 _atom_type_scat_dispersion_imag 
 _atom_type_scat_source 
 'C'  'C'   0.0181   0.0091 
 'International Tables Vol C Tables 4.2.6.8 and 6.1.1.4' 
 'H'  'H'   0.0000   0.0000 
 'International Tables Vol C Tables 4.2.6.8 and 6.1.1.4' 
 'Eu'  'Eu'  -8.9294  11.1857 
 'International Tables Vol C Tables 4.2.6.8 and 6.1.1.4' 
 'O'  'O'   0.0492   0.0322 
 'International Tables Vol C Tables 4.2.6.8 and 6.1.1.4' 
 
_symmetry_cell_setting            'triclinic' 
_symmetry_space_group_name_H-M    'P-1'
 
loop_ 
 _symmetry_equiv_pos_as_xyz 
 'x, y, z' 
 '-x, -y, -z' 
 
_cell_length_a                    9.1035(6) 
_cell_length_b                    13.6438(9) 
_cell_length_c                    17.7320(10) 
_cell_angle_alpha                 87.620(5) 
_cell_angle_beta                  85.388(5) 
_cell_angle_gamma                 86.422(5) 
_cell_volume                      2189.5(2) 
_cell_formula_units_Z             2 
_cell_measurement_temperature     293(2) 
_cell_measurement_reflns_used     10266 
_cell_measurement_theta_min       3.25 
_cell_measurement_theta_max       58.92 
 
_exptl_crystal_description        'block' 
_exptl_crystal_colour             'colorless'
_exptl_crystal_size_max           0.22 
_exptl_crystal_size_mid           0.06
_exptl_crystal_size_min           0.04 
_exptl_crystal_density_meas       ? 
_exptl_crystal_density_diffrn     1.146 
_exptl_crystal_density_method     'not measured' 
_exptl_crystal_F_000              760 
_exptl_absorpt_coefficient_mu     10.626 
_exptl_absorpt_correction_type    'empirical' 
_exptl_absorpt_correction_T_min   0.489
_exptl_absorpt_correction_T_max   0.654
_exptl_absorpt_process_details    'CrysAlisPro' 
 
_exptl_special_details 
; 
 ? 
; 
 
_diffrn_ambient_temperature       293(2) 
_diffrn_radiation_wavelength      1.54178 
_diffrn_radiation_type            CuK\a 
_diffrn_radiation_source          'fine-focus sealed tube' 
_diffrn_radiation_monochromator   graphite 
_diffrn_measurement_device_type   'Xcalibur, Atlas, Gemini ultra'
_diffrn_measurement_method        '\w scans' 
_diffrn_detector_area_resol_mean  10.3592
_diffrn_standards_number          none 
_diffrn_standards_interval_count  none
_diffrn_standards_interval_time   none 
_diffrn_standards_decay_%         ? 
_diffrn_reflns_number             10266 
_diffrn_reflns_av_R_equivalents   0.0768 
_diffrn_reflns_av_sigmaI/netI     0.1272 
_diffrn_reflns_limit_h_min        -9 
_diffrn_reflns_limit_h_max        10 
_diffrn_reflns_limit_k_min        -15 
_diffrn_reflns_limit_k_max        14 
_diffrn_reflns_limit_l_min        -19 
_diffrn_reflns_limit_l_max        19 
_diffrn_reflns_theta_min          3.25 
_diffrn_reflns_theta_max          58.92 
_reflns_number_total              6215 
_reflns_number_gt                 4117 
_reflns_threshold_expression      >2sigma(I) 
 
_computing_data_collection        'CrysAlisPro (Oxford Diffraction Ltd., 2010)' 
_computing_cell_refinement        'CrysAlisPro (Oxford Diffraction Ltd., 2010)' 
_computing_data_reduction         'CrysAlisPro (Oxford Diffraction Ltd., 2010)' 
_computing_structure_solution     'SHELXS-97 (Sheldrick, 1990)' 
_computing_structure_refinement   'SHELXL-97 (Sheldrick, 1997)' 
_computing_molecular_graphics     ? 
_computing_publication_material   ? 
 
_refine_special_details 
; 
 Refinement of F^2^ against ALL reflections.  The weighted R-factor wR and 
 goodness of fit S are based on F^2^, conventional R-factors R are based 
 on F, with F set to zero for negative F^2^. The threshold expression of 
 F^2^ > 2sigma(F^2^) is used only for calculating R-factors(gt) etc. and is 
 not relevant to the choice of reflections for refinement.  R-factors based 
 on F^2^ are statistically about twice as large as those based on F, and R- 
 factors based on ALL data will be even larger. 
; 

# SQUEEZE RESULTS (APPEND TO CIF)
# Note: Data are Listed for all Voids in the P1 Unit Cell
# i.e. Centre of Gravity, Solvent Accessible Volume,
# Recovered number of Electrons in the Void and
# Details about the Squeezed Material
loop_
  _platon_squeeze_void_nr
  _platon_squeeze_void_average_x
  _platon_squeeze_void_average_y
  _platon_squeeze_void_average_z
  _platon_squeeze_void_volume
  _platon_squeeze_void_count_electrons
  _platon_squeeze_void_content
   1 -0.152  0.204  0.296       853       219 ' '
_platon_squeeze_details
;
;
 
_refine_ls_structure_factor_coef  Fsqd  
_refine_ls_matrix_type            full 
_refine_ls_weighting_scheme       calc  
_refine_ls_weighting_details 
 'calc w=1/[\s^2^(Fo^2^)+(0.0533P)^2^+0.0000P] where P=(Fo^2^+2Fc^2^)/3' 
_atom_sites_solution_primary      direct 
_atom_sites_solution_secondary    difmap 
_atom_sites_solution_hydrogens    geom 
_refine_ls_hydrogen_treatment     constr 
_refine_ls_extinction_method      none 
_refine_ls_extinction_coef        ? 
_refine_ls_number_reflns          6215 
_refine_ls_number_parameters      406 
_refine_ls_number_restraints      0 
_refine_ls_R_factor_all           0.1045 
_refine_ls_R_factor_gt            0.0756 
_refine_ls_wR_factor_ref          0.1776 
_refine_ls_wR_factor_gt           0.1619 
_refine_ls_goodness_of_fit_ref    1.034 
_refine_ls_restrained_S_all       1.034 
_refine_ls_shift/su_max           0.000 
_refine_ls_shift/su_mean          0.000 
 
loop_ 
 _atom_site_label 
 _atom_site_type_symbol 
 _atom_site_fract_x 
 _atom_site_fract_y 
 _atom_site_fract_z 
 _atom_site_U_iso_or_equiv 
 _atom_site_adp_type 
 _atom_site_occupancy 
 _atom_site_symmetry_multiplicity 
 _atom_site_calc_flag 
 _atom_site_refinement_flags 
 _atom_site_disorder_assembly 
 _atom_site_disorder_group 
Eu1 Eu 0.20531(8) -0.05140(5) 0.96029(3) 0.0626(2) Uani 1 1 d . . . 
O1 O 0.1789(9) 0.4357(6) 0.6755(4) 0.097(3) Uani 1 1 d . . . 
O2 O 0.3335(9) 0.7346(6) 0.3905(4) 0.089(2) Uani 1 1 d . . . 
O3 O 0.1916(9) 0.3243(7) 0.3412(5) 0.102(3) Uani 1 1 d . . . 
O4 O 0.1202(9) 0.1115(5) 0.9290(4) 0.080(2) Uani 1 1 d . . . 
O5 O -0.1167(10) 0.1596(5) 0.9386(4) 0.084(2) Uani 1 1 d . . . 
O6 O 0.7289(10) 1.0300(5) 0.1841(4) 0.086(2) Uani 1 1 d . . . 
O7 O 0.5813(9) 0.9744(6) 0.1049(4) 0.092(2) Uani 1 1 d . . . 
O8 O 0.0250(10) 0.0629(5) 0.0789(4) 0.085(2) Uani 1 1 d . . . 
O9 O 0.2704(9) 0.0425(5) 0.0627(4) 0.079(2) Uani 1 1 d . . . 
O10 O 0.4375(9) -0.1263(5) 1.0091(4) 0.089(2) Uani 1 1 d . . . 
H10D H 0.4744 -0.1862 0.9940 0.107 Uiso 1 1 d . . . 
H10E H 0.4908 -0.0919 1.0386 0.107 Uiso 1 1 d . . . 
O11 O 0.2508(10) -0.2164(7) 0.9106(4) 0.112(3) Uani 1 1 d . . . 
H11C H 0.3342 -0.2511 0.9204 0.134 Uiso 1 1 d . . . 
H11D H 0.1902 -0.2369 0.8783 0.134 Uiso 1 1 d . . . 
C1 C 0.1812(12) 0.4837(8) 0.5456(5) 0.066(3) Uani 1 1 d . . . 
C2 C 0.2521(12) 0.5727(7) 0.5301(5) 0.067(3) Uani 1 1 d . . . 
C3 C 0.3399(12) 0.5832(8) 0.4636(5) 0.070(3) Uani 1 1 d . . . 
C4 C 0.3583(12) 0.5077(8) 0.4108(5) 0.070(3) Uani 1 1 d . . . 
C5 C 0.2984(12) 0.4170(8) 0.4296(6) 0.070(3) Uani 1 1 d . . . 
C6 C 0.2095(11) 0.4076(7) 0.4981(5) 0.066(3) Uani 1 1 d . . . 
C7 C 0.0819(14) 0.4717(8) 0.6177(6) 0.083(3) Uani 1 1 d . . . 
H7A H 0.0321 0.5342 0.6314 0.099 Uiso 1 1 calc R . . 
H7B H 0.0081 0.4251 0.6114 0.099 Uiso 1 1 calc R . . 
C8 C 0.2287(16) 0.6533(8) 0.5843(5) 0.091(4) Uani 1 1 d . . . 
H8A H 0.1676 0.6321 0.6279 0.136 Uiso 1 1 calc R . . 
H8B H 0.1811 0.7097 0.5604 0.136 Uiso 1 1 calc R . . 
H8C H 0.3222 0.6703 0.5998 0.136 Uiso 1 1 calc R . . 
C9 C 0.4215(14) 0.6751(8) 0.4425(6) 0.079(3) Uani 1 1 d . . . 
H9A H 0.4333 0.7113 0.4874 0.095 Uiso 1 1 calc R . . 
H9B H 0.5186 0.6580 0.4184 0.095 Uiso 1 1 calc R . . 
C10 C 0.4443(15) 0.5239(10) 0.3343(6) 0.100(4) Uani 1 1 d . . . 
H10A H 0.4475 0.4651 0.3063 0.150 Uiso 1 1 calc R . . 
H10B H 0.5430 0.5399 0.3421 0.150 Uiso 1 1 calc R . . 
H10C H 0.3964 0.5769 0.3065 0.150 Uiso 1 1 calc R . . 
C11 C 0.3223(14) 0.3326(9) 0.3774(6) 0.082(3) Uani 1 1 d . . . 
H11A H 0.4038 0.3442 0.3401 0.098 Uiso 1 1 calc R . . 
H11B H 0.3459 0.2723 0.4060 0.098 Uiso 1 1 calc R . . 
C12 C 0.1413(15) 0.3073(8) 0.5187(7) 0.097(4) Uani 1 1 d . . . 
H12A H 0.0874 0.3102 0.5674 0.145 Uiso 1 1 calc R . . 
H12B H 0.2187 0.2563 0.5200 0.145 Uiso 1 1 calc R . . 
H12C H 0.0757 0.2934 0.4812 0.145 Uiso 1 1 calc R . . 
C13 C 0.1270(13) 0.3767(8) 0.7342(6) 0.073(3) Uani 1 1 d . . . 
C14 C 0.2330(15) 0.3248(9) 0.7714(7) 0.088(4) Uani 1 1 d . . . 
H14A H 0.3319 0.3331 0.7565 0.106 Uiso 1 1 calc R . . 
C15 C 0.1971(14) 0.2605(9) 0.8306(6) 0.085(3) Uani 1 1 d . . . 
H15A H 0.2713 0.2269 0.8562 0.102 Uiso 1 1 calc R . . 
C16 C 0.0493(13) 0.2455(8) 0.8524(6) 0.070(3) Uani 1 1 d . . . 
C17 C -0.0555(15) 0.2983(8) 0.8178(6) 0.084(3) Uani 1 1 d . . . 
H17A H -0.1540 0.2908 0.8339 0.101 Uiso 1 1 calc R . . 
C18 C -0.0193(15) 0.3672(8) 0.7554(6) 0.088(4) Uani 1 1 d . . . 
H18A H -0.0926 0.4034 0.7309 0.105 Uiso 1 1 calc R . . 
C19 C 0.0143(15) 0.1660(7) 0.9107(6) 0.069(3) Uani 1 1 d . . . 
C20 C 0.4087(13) 0.7992(8) 0.3435(6) 0.073(3) Uani 1 1 d . . . 
C21 C 0.5348(13) 0.8439(8) 0.3568(6) 0.077(3) Uani 1 1 d . . . 
H21A H 0.5762 0.8332 0.4029 0.092 Uiso 1 1 calc R . . 
C22 C 0.5996(13) 0.9047(8) 0.3015(6) 0.077(3) Uani 1 1 d . . . 
H22A H 0.6845 0.9349 0.3114 0.092 Uiso 1 1 calc R . . 
C23 C 0.5436(13) 0.9220(8) 0.2328(5) 0.073(3) Uani 1 1 d . . . 
C24 C 0.4146(14) 0.8792(8) 0.2193(6) 0.089(4) Uani 1 1 d . . . 
H24A H 0.3742 0.8905 0.1729 0.107 Uiso 1 1 calc R . . 
C25 C 0.3457(15) 0.8197(9) 0.2745(7) 0.090(4) Uani 1 1 d . . . 
H25A H 0.2571 0.7932 0.2659 0.108 Uiso 1 1 calc R . . 
C26 C 0.6236(14) 0.9791(8) 0.1731(6) 0.074(3) Uani 1 1 d . . . 
C27 C 0.1923(14) 0.2593(8) 0.2837(6) 0.081(3) Uani 1 1 d . . . 
C28 C 0.0557(16) 0.2408(11) 0.2609(8) 0.116(5) Uani 1 1 d . . . 
H28A H -0.0293 0.2685 0.2863 0.139 Uiso 1 1 calc R . . 
C29 C 0.0444(15) 0.1826(10) 0.2018(7) 0.102(4) Uani 1 1 d . . . 
H29A H -0.0484 0.1721 0.1863 0.122 Uiso 1 1 calc R . . 
C30 C 0.1688(14) 0.1384(8) 0.1639(5) 0.074(3) Uani 1 1 d . . . 
C31 C 0.3059(13) 0.1559(7) 0.1870(5) 0.069(3) Uani 1 1 d . . . 
H31A H 0.3905 0.1281 0.1613 0.083 Uiso 1 1 calc R . . 
C32 C 0.3188(13) 0.2137(8) 0.2473(6) 0.078(3) Uani 1 1 d . . . 
H32A H 0.4112 0.2224 0.2639 0.094 Uiso 1 1 calc R . . 
C33 C 0.1565(15) 0.0776(8) 0.0974(6) 0.069(3) Uani 1 1 d . . . 
 
loop_ 
 _atom_site_aniso_label 
 _atom_site_aniso_U_11 
 _atom_site_aniso_U_22 
 _atom_site_aniso_U_33 
 _atom_site_aniso_U_23 
 _atom_site_aniso_U_13 
 _atom_site_aniso_U_12 
Eu1 0.0721(4) 0.0686(4) 0.0472(3) -0.0011(2) 0.0016(3) -0.0145(3) 
O1 0.092(6) 0.134(7) 0.066(4) 0.043(4) -0.010(4) -0.044(5) 
O2 0.091(6) 0.102(5) 0.072(5) 0.033(4) 0.001(4) -0.022(4) 
O3 0.073(6) 0.127(7) 0.108(6) -0.055(5) -0.006(5) -0.002(5) 
O4 0.098(6) 0.072(5) 0.069(4) 0.007(3) 0.003(4) -0.009(4) 
O5 0.095(6) 0.098(5) 0.056(4) 0.019(4) 0.003(4) -0.011(4) 
O6 0.111(6) 0.092(5) 0.057(4) -0.004(4) 0.016(4) -0.040(5) 
O7 0.089(6) 0.128(6) 0.061(4) 0.024(4) -0.006(4) -0.035(5) 
O8 0.099(6) 0.103(6) 0.055(4) -0.004(4) 0.003(4) -0.026(5) 
O9 0.071(5) 0.100(5) 0.069(4) -0.029(4) -0.007(4) -0.006(4) 
O10 0.098(6) 0.086(5) 0.088(5) -0.009(4) -0.032(4) 0.003(4) 
O11 0.103(7) 0.156(8) 0.077(5) -0.035(5) -0.010(5) 0.005(6) 
C1 0.076(7) 0.077(7) 0.045(5) -0.003(5) 0.001(5) -0.018(6) 
C2 0.085(8) 0.059(6) 0.054(6) 0.006(4) 0.007(5) -0.006(5) 
C3 0.082(8) 0.079(7) 0.048(5) 0.015(5) -0.003(5) -0.019(6) 
C4 0.069(7) 0.087(7) 0.054(6) -0.005(5) 0.000(5) -0.012(6) 
C5 0.067(7) 0.080(7) 0.064(6) -0.004(5) -0.003(5) -0.007(6) 
C6 0.063(7) 0.075(6) 0.061(6) 0.010(5) -0.009(5) -0.015(5) 
C7 0.102(9) 0.083(7) 0.063(6) 0.009(5) 0.000(6) -0.017(6) 
C8 0.144(12) 0.080(7) 0.047(6) -0.013(5) 0.002(6) -0.010(7) 
C9 0.103(9) 0.076(7) 0.057(6) 0.004(5) 0.003(6) -0.024(6) 
C10 0.118(11) 0.128(10) 0.053(6) -0.014(6) 0.021(6) -0.028(8) 
C11 0.082(9) 0.090(8) 0.077(7) -0.025(6) -0.014(6) -0.001(6) 
C12 0.110(11) 0.082(8) 0.100(9) -0.001(6) -0.001(7) -0.021(7) 
C13 0.072(8) 0.083(7) 0.062(6) 0.019(5) 0.007(6) -0.027(6) 
C14 0.081(9) 0.098(9) 0.079(8) 0.012(7) 0.011(7) 0.005(7) 
C15 0.081(9) 0.105(9) 0.068(7) 0.018(6) -0.004(6) -0.007(7) 
C16 0.063(7) 0.079(7) 0.067(6) 0.008(5) 0.006(5) -0.008(6) 
C17 0.092(9) 0.083(7) 0.074(7) 0.014(6) 0.015(7) -0.017(7) 
C18 0.107(10) 0.088(8) 0.066(7) 0.027(6) -0.001(6) -0.020(7) 
C19 0.073(8) 0.057(6) 0.077(7) -0.009(5) -0.005(6) 0.010(6) 
C20 0.087(9) 0.072(7) 0.059(6) 0.011(5) 0.002(6) -0.009(6) 
C21 0.090(9) 0.082(7) 0.060(6) 0.006(5) -0.003(6) -0.018(6) 
C22 0.090(8) 0.079(7) 0.062(6) 0.003(5) 0.004(6) -0.016(6) 
C23 0.093(9) 0.076(7) 0.050(6) 0.004(5) 0.007(5) -0.026(6) 
C24 0.108(10) 0.093(8) 0.064(6) 0.030(6) 0.004(6) -0.031(7) 
C25 0.094(9) 0.093(8) 0.087(8) -0.002(6) -0.014(7) -0.030(7) 
C26 0.077(8) 0.077(7) 0.064(7) 0.013(5) 0.011(6) -0.001(6) 
C27 0.090(9) 0.085(7) 0.070(7) -0.033(6) -0.007(6) -0.007(7) 
C28 0.077(10) 0.160(13) 0.115(10) -0.079(10) -0.001(8) -0.004(9) 
C29 0.078(9) 0.145(11) 0.087(8) -0.056(8) -0.007(7) -0.012(8) 
C30 0.087(9) 0.088(7) 0.048(5) -0.019(5) -0.003(6) -0.010(6) 
C31 0.072(8) 0.075(7) 0.061(6) -0.015(5) -0.002(5) -0.005(5) 
C32 0.061(7) 0.101(8) 0.074(7) -0.019(6) -0.001(6) -0.002(6) 
C33 0.079(9) 0.070(7) 0.059(6) -0.004(5) -0.008(6) -0.015(6) 
 
_geom_special_details 
; 
 All esds (except the esd in the dihedral angle between two l.s. planes) 
 are estimated using the full covariance matrix.  The cell esds are taken 
 into account individually in the estimation of esds in distances, angles 
 and torsion angles; correlations between esds in cell parameters are only 
 used when they are defined by crystal symmetry.  An approximate (isotropic) 
 treatment of cell esds is used for estimating esds involving l.s. planes. 
; 
 
loop_ 
 _geom_bond_atom_site_label_1 
 _geom_bond_atom_site_label_2 
 _geom_bond_distance 
 _geom_bond_site_symmetry_2 
 _geom_bond_publ_flag 
Eu1 O8 2.277(9) 2_556 ? 
Eu1 O4 2.367(8) . ? 
Eu1 O5 2.396(6) 2_557 ? 
Eu1 O9 2.398(7) 1_556 ? 
Eu1 O11 2.450(9) . ? 
Eu1 O7 2.451(7) 2_666 ? 
Eu1 O10 2.493(8) . ? 
Eu1 O6 2.591(6) 2_666 ? 
Eu1 C26 2.899(10) 2_666 ? 
Eu1 O8 2.991(7) 1_556 ? 
Eu1 C33 3.049(11) 1_556 ? 
Eu1 Eu1 4.0726(14) 2_557 ? 
O1 C13 1.363(11) . ? 
O1 C7 1.457(14) . ? 
O2 C20 1.365(11) . ? 
O2 C9 1.458(13) . ? 
O3 C27 1.377(12) . ? 
O3 C11 1.410(14) . ? 
O4 C19 1.236(12) . ? 
O5 C19 1.261(12) . ? 
O5 Eu1 2.396(6) 2_557 ? 
O6 C26 1.251(14) . ? 
O6 Eu1 2.591(6) 2_666 ? 
O7 C26 1.304(14) . ? 
O7 Eu1 2.451(7) 2_666 ? 
O8 C33 1.297(13) . ? 
O8 Eu1 2.277(9) 2_556 ? 
O8 Eu1 2.991(7) 1_554 ? 
O9 C33 1.243(13) . ? 
O9 Eu1 2.398(7) 1_554 ? 
O10 H10D 0.9065 . ? 
O10 H10E 0.9047 . ? 
O11 H11C 0.8950 . ? 
O11 H11D 0.8920 . ? 
C1 C6 1.363(14) . ? 
C1 C2 1.417(13) . ? 
C1 C7 1.515(13) . ? 
C2 C3 1.378(13) . ? 
C2 C8 1.486(14) . ? 
C3 C4 1.413(14) . ? 
C3 C9 1.516(14) . ? 
C4 C5 1.401(14) . ? 
C4 C10 1.525(13) . ? 
C5 C6 1.410(13) . ? 
C5 C11 1.502(15) . ? 
C6 C12 1.556(14) . ? 
C7 H7A 0.9700 . ? 
C7 H7B 0.9700 . ? 
C8 H8A 0.9600 . ? 
C8 H8B 0.9600 . ? 
C8 H8C 0.9600 . ? 
C9 H9A 0.9700 . ? 
C9 H9B 0.9700 . ? 
C10 H10A 0.9600 . ? 
C10 H10B 0.9600 . ? 
C10 H10C 0.9600 . ? 
C11 H11A 0.9700 . ? 
C11 H11B 0.9700 . ? 
C12 H12A 0.9600 . ? 
C12 H12B 0.9600 . ? 
C12 H12C 0.9600 . ? 
C13 C14 1.358(16) . ? 
C13 C18 1.367(15) . ? 
C14 C15 1.372(14) . ? 
C14 H14A 0.9300 . ? 
C15 C16 1.395(15) . ? 
C15 H15A 0.9300 . ? 
C16 C17 1.333(15) . ? 
C16 C19 1.499(15) . ? 
C17 C18 1.452(13) . ? 
C17 H17A 0.9300 . ? 
C18 H18A 0.9300 . ? 
C20 C21 1.375(16) . ? 
C20 C25 1.402(16) . ? 
C21 C22 1.376(13) . ? 
C21 H21A 0.9300 . ? 
C22 C23 1.365(15) . ? 
C22 H22A 0.9300 . ? 
C23 C24 1.386(16) . ? 
C23 C26 1.461(14) . ? 
C24 C25 1.382(14) . ? 
C24 H24A 0.9300 . ? 
C25 H25A 0.9300 . ? 
C26 Eu1 2.899(10) 2_666 ? 
C27 C28 1.380(17) . ? 
C27 C32 1.398(15) . ? 
C28 C29 1.356(16) . ? 
C28 H28A 0.9300 . ? 
C29 C30 1.387(16) . ? 
C29 H29A 0.9300 . ? 
C30 C31 1.382(15) . ? 
C30 C33 1.484(14) . ? 
C31 C32 1.372(14) . ? 
C31 H31A 0.9300 . ? 
C32 H32A 0.9300 . ? 
C33 Eu1 3.049(11) 1_554 ? 
 
loop_ 
 _geom_angle_atom_site_label_1 
 _geom_angle_atom_site_label_2 
 _geom_angle_atom_site_label_3 
 _geom_angle 
 _geom_angle_site_symmetry_1 
 _geom_angle_site_symmetry_3 
 _geom_angle_publ_flag 
O8 Eu1 O4 74.3(3) 2_556 . ? 
O8 Eu1 O5 83.2(3) 2_556 2_557 ? 
O4 Eu1 O5 129.0(3) . 2_557 ? 
O8 Eu1 O9 126.7(3) 2_556 1_556 ? 
O4 Eu1 O9 75.7(3) . 1_556 ? 
O5 Eu1 O9 82.8(3) 2_557 1_556 ? 
O8 Eu1 O11 84.0(3) 2_556 . ? 
O4 Eu1 O11 143.5(3) . . ? 
O5 Eu1 O11 75.3(3) 2_557 . ? 
O9 Eu1 O11 139.8(3) 1_556 . ? 
O8 Eu1 O7 129.2(2) 2_556 2_666 ? 
O4 Eu1 O7 74.5(3) . 2_666 ? 
O5 Eu1 O7 146.9(3) 2_557 2_666 ? 
O9 Eu1 O7 81.8(3) 1_556 2_666 ? 
O11 Eu1 O7 98.6(3) . 2_666 ? 
O8 Eu1 O10 151.7(3) 2_556 . ? 
O4 Eu1 O10 133.9(3) . . ? 
O5 Eu1 O10 77.1(3) 2_557 . ? 
O9 Eu1 O10 70.8(3) 1_556 . ? 
O11 Eu1 O10 71.6(3) . . ? 
O7 Eu1 O10 70.2(3) 2_666 . ? 
O8 Eu1 O6 81.8(3) 2_556 2_666 ? 
O4 Eu1 O6 75.2(2) . 2_666 ? 
O5 Eu1 O6 146.0(3) 2_557 2_666 ? 
O9 Eu1 O6 130.2(2) 1_556 2_666 ? 
O11 Eu1 O6 72.9(3) . 2_666 ? 
O7 Eu1 O6 51.8(3) 2_666 2_666 ? 
O10 Eu1 O6 103.6(3) . 2_666 ? 
O8 Eu1 C26 104.2(3) 2_556 2_666 ? 
O4 Eu1 C26 70.4(3) . 2_666 ? 
O5 Eu1 C26 160.6(3) 2_557 2_666 ? 
O9 Eu1 C26 105.7(3) 1_556 2_666 ? 
O11 Eu1 C26 87.5(3) . 2_666 ? 
O7 Eu1 C26 26.6(3) 2_666 2_666 ? 
O10 Eu1 C26 89.1(3) . 2_666 ? 
O6 Eu1 C26 25.6(3) 2_666 2_666 ? 
O8 Eu1 O8 79.6(3) 2_556 1_556 ? 
O4 Eu1 O8 61.6(2) . 1_556 ? 
O5 Eu1 O8 69.7(2) 2_557 1_556 ? 
O9 Eu1 O8 47.3(2) 1_556 1_556 ? 
O11 Eu1 O8 142.8(2) . 1_556 ? 
O7 Eu1 O8 117.7(3) 2_666 1_556 ? 
O10 Eu1 O8 111.4(2) . 1_556 ? 
O6 Eu1 O8 136.1(2) 2_666 1_556 ? 
C26 Eu1 O8 128.8(3) 2_666 1_556 ? 
O8 Eu1 C33 104.3(3) 2_556 1_556 ? 
O4 Eu1 C33 67.1(3) . 1_556 ? 
O5 Eu1 C33 75.5(3) 2_557 1_556 ? 
O9 Eu1 C33 22.6(3) 1_556 1_556 ? 
O11 Eu1 C33 148.4(3) . 1_556 ? 
O7 Eu1 C33 99.2(3) 2_666 1_556 ? 
O10 Eu1 C33 90.2(3) . 1_556 ? 
O6 Eu1 C33 138.0(2) 2_666 1_556 ? 
C26 Eu1 C33 118.7(3) 2_666 1_556 ? 
O8 Eu1 C33 24.8(3) 1_556 1_556 ? 
O8 Eu1 Eu1 46.26(18) 2_556 2_557 ? 
O4 Eu1 Eu1 59.98(18) . 2_557 ? 
O5 Eu1 Eu1 71.3(2) 2_557 2_557 ? 
O9 Eu1 Eu1 80.61(19) 1_556 2_557 ? 
O11 Eu1 Eu1 121.8(2) . 2_557 ? 
O7 Eu1 Eu1 134.0(2) 2_666 2_557 ? 
O10 Eu1 Eu1 139.53(18) . 2_557 ? 
O6 Eu1 Eu1 116.7(2) 2_666 2_557 ? 
C26 Eu1 Eu1 126.7(2) 2_666 2_557 ? 
O8 Eu1 Eu1 33.37(17) 1_556 2_557 ? 
C33 Eu1 Eu1 58.1(3) 1_556 2_557 ? 
C13 O1 C7 120.2(9) . . ? 
C20 O2 C9 115.9(8) . . ? 
C27 O3 C11 118.9(9) . . ? 
C19 O4 Eu1 146.0(7) . . ? 
C19 O5 Eu1 127.8(7) . 2_557 ? 
C26 O6 Eu1 91.1(6) . 2_666 ? 
C26 O7 Eu1 96.3(7) . 2_666 ? 
C33 O8 Eu1 174.3(7) . 2_556 ? 
C33 O8 Eu1 80.1(6) . 1_554 ? 
Eu1 O8 Eu1 100.4(3) 2_556 1_554 ? 
C33 O9 Eu1 109.6(7) . 1_554 ? 
Eu1 O10 H10D 120.4 . . ? 
Eu1 O10 H10E 120.5 . . ? 
H10D O10 H10E 118.8 . . ? 
Eu1 O11 H11C 119.0 . . ? 
Eu1 O11 H11D 119.1 . . ? 
H11C O11 H11D 121.5 . . ? 
C6 C1 C2 120.0(8) . . ? 
C6 C1 C7 120.4(9) . . ? 
C2 C1 C7 119.5(9) . . ? 
C3 C2 C1 118.8(9) . . ? 
C3 C2 C8 121.2(9) . . ? 
C1 C2 C8 120.0(8) . . ? 
C2 C3 C4 121.2(9) . . ? 
C2 C3 C9 122.6(10) . . ? 
C4 C3 C9 116.2(8) . . ? 
C5 C4 C3 119.4(8) . . ? 
C5 C4 C10 120.0(10) . . ? 
C3 C4 C10 120.6(9) . . ? 
C4 C5 C6 118.2(10) . . ? 
C4 C5 C11 121.5(9) . . ? 
C6 C5 C11 120.3(9) . . ? 
C1 C6 C5 121.9(9) . . ? 
C1 C6 C12 119.9(9) . . ? 
C5 C6 C12 118.2(10) . . ? 
O1 C7 C1 105.6(9) . . ? 
O1 C7 H7A 110.6 . . ? 
C1 C7 H7A 110.6 . . ? 
O1 C7 H7B 110.6 . . ? 
C1 C7 H7B 110.6 . . ? 
H7A C7 H7B 108.7 . . ? 
C2 C8 H8A 109.5 . . ? 
C2 C8 H8B 109.5 . . ? 
H8A C8 H8B 109.5 . . ? 
C2 C8 H8C 109.5 . . ? 
H8A C8 H8C 109.5 . . ? 
H8B C8 H8C 109.5 . . ? 
O2 C9 C3 107.1(9) . . ? 
O2 C9 H9A 110.3 . . ? 
C3 C9 H9A 110.3 . . ? 
O2 C9 H9B 110.3 . . ? 
C3 C9 H9B 110.3 . . ? 
H9A C9 H9B 108.5 . . ? 
C4 C10 H10A 109.5 . . ? 
C4 C10 H10B 109.5 . . ? 
H10A C10 H10B 109.5 . . ? 
C4 C10 H10C 109.5 . . ? 
H10A C10 H10C 109.5 . . ? 
H10B C10 H10C 109.5 . . ? 
O3 C11 C5 108.3(9) . . ? 
O3 C11 H11A 110.0 . . ? 
C5 C11 H11A 110.0 . . ? 
O3 C11 H11B 110.0 . . ? 
C5 C11 H11B 110.0 . . ? 
H11A C11 H11B 108.4 . . ? 
C6 C12 H12A 109.5 . . ? 
C6 C12 H12B 109.5 . . ? 
H12A C12 H12B 109.5 . . ? 
C6 C12 H12C 109.5 . . ? 
H12A C12 H12C 109.5 . . ? 
H12B C12 H12C 109.5 . . ? 
C14 C13 O1 114.9(10) . . ? 
C14 C13 C18 120.8(9) . . ? 
O1 C13 C18 124.3(11) . . ? 
C13 C14 C15 121.3(11) . . ? 
C13 C14 H14A 119.3 . . ? 
C15 C14 H14A 119.3 . . ? 
C14 C15 C16 119.9(12) . . ? 
C14 C15 H15A 120.0 . . ? 
C16 C15 H15A 120.0 . . ? 
C17 C16 C15 119.1(10) . . ? 
C17 C16 C19 122.3(10) . . ? 
C15 C16 C19 118.5(11) . . ? 
C16 C17 C18 121.5(11) . . ? 
C16 C17 H17A 119.2 . . ? 
C18 C17 H17A 119.2 . . ? 
C13 C18 C17 117.2(11) . . ? 
C13 C18 H18A 121.4 . . ? 
C17 C18 H18A 121.4 . . ? 
O4 C19 O5 124.6(10) . . ? 
O4 C19 C16 115.9(11) . . ? 
O5 C19 C16 119.5(11) . . ? 
O2 C20 C21 127.4(10) . . ? 
O2 C20 C25 113.7(11) . . ? 
C21 C20 C25 118.8(9) . . ? 
C20 C21 C22 119.7(10) . . ? 
C20 C21 H21A 120.1 . . ? 
C22 C21 H21A 120.1 . . ? 
C23 C22 C21 122.2(11) . . ? 
C23 C22 H22A 118.9 . . ? 
C21 C22 H22A 118.9 . . ? 
C22 C23 C24 118.6(9) . . ? 
C22 C23 C26 120.5(11) . . ? 
C24 C23 C26 120.8(10) . . ? 
C25 C24 C23 120.2(11) . . ? 
C25 C24 H24A 119.9 . . ? 
C23 C24 H24A 119.9 . . ? 
C24 C25 C20 120.3(11) . . ? 
C24 C25 H25A 119.8 . . ? 
C20 C25 H25A 119.8 . . ? 
O6 C26 O7 119.6(9) . . ? 
O6 C26 C23 123.8(11) . . ? 
O7 C26 C23 116.6(11) . . ? 
O6 C26 Eu1 63.4(5) . 2_666 ? 
O7 C26 Eu1 57.2(5) . 2_666 ? 
C23 C26 Eu1 167.5(8) . 2_666 ? 
O3 C27 C28 115.7(11) . . ? 
O3 C27 C32 125.2(11) . . ? 
C28 C27 C32 119.1(10) . . ? 
C29 C28 C27 120.4(12) . . ? 
C29 C28 H28A 119.8 . . ? 
C27 C28 H28A 119.8 . . ? 
C28 C29 C30 121.2(13) . . ? 
C28 C29 H29A 119.4 . . ? 
C30 C29 H29A 119.4 . . ? 
C31 C30 C29 118.6(10) . . ? 
C31 C30 C33 120.3(11) . . ? 
C29 C30 C33 121.0(11) . . ? 
C32 C31 C30 120.8(10) . . ? 
C32 C31 H31A 119.6 . . ? 
C30 C31 H31A 119.6 . . ? 
C31 C32 C27 119.7(11) . . ? 
C31 C32 H32A 120.1 . . ? 
C27 C32 H32A 120.1 . . ? 
O9 C33 O8 122.9(10) . . ? 
O9 C33 C30 119.5(11) . . ? 
O8 C33 C30 117.5(11) . . ? 
O9 C33 Eu1 47.8(5) . 1_554 ? 
O8 C33 Eu1 75.1(6) . 1_554 ? 
C30 C33 Eu1 167.3(9) . 1_554 ? 
 
_diffrn_measured_fraction_theta_max    0.988 
_diffrn_reflns_theta_full              58.92 
_diffrn_measured_fraction_theta_full   0.988 
_refine_diff_density_max    1.062 
_refine_diff_density_min   -0.859 
_refine_diff_density_rms    0.114 


#===END


data_Tb-TCM 
 
_audit_creation_method            SHELXL-97 
_chemical_name_systematic 
; 
 ? 
; 
_chemical_name_common             ? 
_chemical_melting_point           ? 
_chemical_formula_moiety          ? 
_chemical_formula_sum 
 'C33 H31 O11 Tb' 
_chemical_formula_weight          762.50 
 
loop_ 
 _atom_type_symbol 
 _atom_type_description 
 _atom_type_scat_dispersion_real 
 _atom_type_scat_dispersion_imag 
 _atom_type_scat_source 
 'C'  'C'   0.0181   0.0091 
 'International Tables Vol C Tables 4.2.6.8 and 6.1.1.4' 
 'H'  'H'   0.0000   0.0000 
 'International Tables Vol C Tables 4.2.6.8 and 6.1.1.4' 
 'O'  'O'   0.0492   0.0322 
 'International Tables Vol C Tables 4.2.6.8 and 6.1.1.4' 
 'Tb'  'Tb'  -9.1472   9.1891 
 'International Tables Vol C Tables 4.2.6.8 and 6.1.1.4' 
 
_symmetry_cell_setting            'triclinic' 
_symmetry_space_group_name_H-M    'P-1'
 
loop_ 
 _symmetry_equiv_pos_as_xyz 
 'x, y, z' 
 '-x, -y, -z' 
 
_cell_length_a                    9.1308(3) 
_cell_length_b                    13.6503(4) 
_cell_length_c                    17.7229(5) 
_cell_angle_alpha                 87.558(2) 
_cell_angle_beta                  85.382(3) 
_cell_angle_gamma                 86.398(3) 
_cell_volume                      2195.86(11) 
_cell_formula_units_Z             2 
_cell_measurement_temperature     293(2) 
_cell_measurement_reflns_used     19897 
_cell_measurement_theta_min       3.25 
_cell_measurement_theta_max       66.75 
 
_exptl_crystal_description        'block' 
_exptl_crystal_colour             'colorless'
_exptl_crystal_size_max           0.25 
_exptl_crystal_size_mid           0.10
_exptl_crystal_size_min           0.03 
_exptl_crystal_density_meas       ? 
_exptl_crystal_density_diffrn     1.153 
_exptl_crystal_density_method     'not measured' 
_exptl_crystal_F_000              764 
_exptl_absorpt_coefficient_mu     8.291 
_exptl_absorpt_correction_type    'empirical' 
_exptl_absorpt_correction_T_min   0.425
_exptl_absorpt_correction_T_max   0.780
_exptl_absorpt_process_details    'CrysAlisPro' 
 
_exptl_special_details 
; 
 ? 
; 
 
_diffrn_ambient_temperature       293(2) 
_diffrn_radiation_wavelength      1.54178 
_diffrn_radiation_type            CuK\a 
_diffrn_radiation_source          'fine-focus sealed tube' 
_diffrn_radiation_monochromator   graphite 
_diffrn_measurement_device_type   'Xcalibur, Atlas, Gemini ultra'
_diffrn_measurement_method        '\w scans' 
_diffrn_detector_area_resol_mean  10.3592
_diffrn_standards_number          none 
_diffrn_standards_interval_count  none
_diffrn_standards_interval_time   none 
_diffrn_standards_decay_%         ? 
_diffrn_reflns_number             19897 
_diffrn_reflns_av_R_equivalents   0.0349 
_diffrn_reflns_av_sigmaI/netI     0.0324 
_diffrn_reflns_limit_h_min        -10 
_diffrn_reflns_limit_h_max        10 
_diffrn_reflns_limit_k_min        -16 
_diffrn_reflns_limit_k_max        15 
_diffrn_reflns_limit_l_min        -21 
_diffrn_reflns_limit_l_max        21 
_diffrn_reflns_theta_min          3.25 
_diffrn_reflns_theta_max          66.75 
_reflns_number_total              7701 
_reflns_number_gt                 7156 
_reflns_threshold_expression      >2sigma(I) 
 
_computing_data_collection        'CrysAlisPro (Oxford Diffraction Ltd., 2010)' 
_computing_cell_refinement        'CrysAlisPro (Oxford Diffraction Ltd., 2010)' 
_computing_data_reduction         'CrysAlisPro (Oxford Diffraction Ltd., 2010)' 
_computing_structure_solution     'SHELXS-97 (Sheldrick, 1990)' 
_computing_structure_refinement   'SHELXL-97 (Sheldrick, 1997)' 
_computing_molecular_graphics     ? 
_computing_publication_material   ? 
 
_refine_special_details 
; 
 Refinement of F^2^ against ALL reflections.  The weighted R-factor wR and 
 goodness of fit S are based on F^2^, conventional R-factors R are based 
 on F, with F set to zero for negative F^2^. The threshold expression of 
 F^2^ > 2sigma(F^2^) is used only for calculating R-factors(gt) etc. and is 
 not relevant to the choice of reflections for refinement.  R-factors based 
 on F^2^ are statistically about twice as large as those based on F, and R- 
 factors based on ALL data will be even larger. 
;
# SQUEEZE RESULTS (APPEND TO CIF)
# Note: Data are Listed for all Voids in the P1 Unit Cell
# i.e. Centre of Gravity, Solvent Accessible Volume,
# Recovered number of Electrons in the Void and
# Details about the Squeezed Material
loop_
  _platon_squeeze_void_nr
  _platon_squeeze_void_average_x
  _platon_squeeze_void_average_y
  _platon_squeeze_void_average_z
  _platon_squeeze_void_volume
  _platon_squeeze_void_count_electrons
  _platon_squeeze_void_content
   1 -0.028 -0.018  0.018       883       232 ' '
_platon_squeeze_details
;
;
 
_refine_ls_structure_factor_coef  Fsqd  
_refine_ls_matrix_type            full 
_refine_ls_weighting_scheme       calc  
_refine_ls_weighting_details 
 'calc w=1/[\s^2^(Fo^2^)+(0.0553P)^2^+1.6706P] where P=(Fo^2^+2Fc^2^)/3' 
_atom_sites_solution_primary      direct 
_atom_sites_solution_secondary    difmap 
_atom_sites_solution_hydrogens    geom 
_refine_ls_hydrogen_treatment     constr 
_refine_ls_extinction_method      none 
_refine_ls_extinction_coef        ? 
_refine_ls_number_reflns          7701 
_refine_ls_number_parameters      406 
_refine_ls_number_restraints      0 
_refine_ls_R_factor_all           0.0407 
_refine_ls_R_factor_gt            0.0382 
_refine_ls_wR_factor_ref          0.1006 
_refine_ls_wR_factor_gt           0.0985 
_refine_ls_goodness_of_fit_ref    1.022 
_refine_ls_restrained_S_all       1.022 
_refine_ls_shift/su_max           0.000 
_refine_ls_shift/su_mean          0.000 
 
loop_ 
 _atom_site_label 
 _atom_site_type_symbol 
 _atom_site_fract_x 
 _atom_site_fract_y 
 _atom_site_fract_z 
 _atom_site_U_iso_or_equiv 
 _atom_site_adp_type 
 _atom_site_occupancy 
 _atom_site_symmetry_multiplicity 
 _atom_site_calc_flag 
 _atom_site_refinement_flags 
 _atom_site_disorder_assembly 
 _atom_site_disorder_group 
Tb1 Tb 0.70537(2) 0.948360(14) 0.460463(10) 0.04488(9) Uani 1 1 d . . . 
O1 O 0.6910(4) 1.3244(3) 0.8410(2) 0.0838(10) Uani 1 1 d . . . 
O2 O 0.6791(4) 1.4353(3) 1.17514(17) 0.0794(9) Uani 1 1 d . . . 
O3 O 0.8349(3) 1.7346(2) 0.89005(17) 0.0688(7) Uani 1 1 d . . . 
O4 O 0.7662(3) 1.0414(2) 0.56278(16) 0.0657(7) Uani 1 1 d . . . 
O5 O 0.5254(3) 1.0611(2) 0.57988(15) 0.0661(7) Uani 1 1 d . . . 
O6 O 0.6229(4) 1.1092(2) 1.42945(17) 0.0698(7) Uani 1 1 d . . . 
O7 O 0.3843(4) 1.1590(2) 1.43885(16) 0.0680(7) Uani 1 1 d . . . 
O8 O 1.2287(4) 2.0295(2) 0.68356(16) 0.0703(8) Uani 1 1 d . . . 
O9 O 1.0836(3) 1.9766(3) 0.60475(16) 0.0717(8) Uani 1 1 d . . . 
O10 O 0.7512(4) 0.7880(2) 0.4098(2) 0.0843(9) Uani 1 1 d . . . 
H10D H 0.8310 0.7496 0.4218 0.101 Uiso 1 1 d . . . 
H10E H 0.6891 0.7652 0.3783 0.101 Uiso 1 1 d . . . 
O11 O 0.9330(4) 0.8751(2) 0.51005(18) 0.0730(8) Uani 1 1 d . . . 
H11C H 0.9681 0.8142 0.4971 0.088 Uiso 1 1 d . . . 
H11D H 0.9827 0.9086 0.5417 0.088 Uiso 1 1 d . . . 
C1 C 0.7978(4) 1.4182(3) 0.9290(2) 0.0572(9) Uani 1 1 d . . . 
C2 C 0.7106(4) 1.4056(3) 0.9971(2) 0.0562(9) Uani 1 1 d . . . 
C3 C 0.6836(4) 1.4836(3) 1.0455(2) 0.0520(8) Uani 1 1 d . . . 
C4 C 0.7520(4) 1.5725(3) 1.02919(19) 0.0512(8) Uani 1 1 d . . . 
C5 C 0.8411(4) 1.5830(3) 0.9621(2) 0.0524(8) Uani 1 1 d . . . 
C6 C 0.8585(4) 1.5084(3) 0.9102(2) 0.0547(8) Uani 1 1 d . . . 
C7 C 0.8251(5) 1.3349(3) 0.8759(3) 0.0686(11) Uani 1 1 d . . . 
H7A H 0.9039 1.3491 0.8377 0.082 Uiso 1 1 calc R . . 
H7B H 0.8532 1.2747 0.9036 0.082 Uiso 1 1 calc R . . 
C8 C 0.6466(6) 1.3082(3) 1.0185(3) 0.0795(13) Uani 1 1 d . . . 
H8A H 0.5911 1.3124 1.0668 0.119 Uiso 1 1 calc R . . 
H8B H 0.7248 1.2582 1.0217 0.119 Uiso 1 1 calc R . . 
H8C H 0.5832 1.2920 0.9809 0.119 Uiso 1 1 calc R . . 
C9 C 0.5846(5) 1.4715(3) 1.1171(2) 0.0607(9) Uani 1 1 d . . . 
H9A H 0.5351 1.5340 1.1307 0.073 Uiso 1 1 calc R . . 
H9B H 0.5109 1.4251 1.1104 0.073 Uiso 1 1 calc R . . 
C10 C 0.7306(6) 1.6533(3) 1.0849(2) 0.0728(12) Uani 1 1 d . . . 
H10A H 0.6609 1.6350 1.1257 0.109 Uiso 1 1 calc R . . 
H10B H 0.6943 1.7127 1.0598 0.109 Uiso 1 1 calc R . . 
H10C H 0.8229 1.6640 1.1046 0.109 Uiso 1 1 calc R . . 
C11 C 0.9196(5) 1.6765(3) 0.9430(2) 0.0602(9) Uani 1 1 d . . . 
H11A H 0.9267 1.7124 0.9884 0.072 Uiso 1 1 calc R . . 
H11B H 1.0183 1.6610 0.9205 0.072 Uiso 1 1 calc R . . 
C12 C 0.9428(6) 1.5267(4) 0.8341(3) 0.0782(13) Uani 1 1 d . . . 
H12A H 0.9762 1.5922 0.8313 0.117 Uiso 1 1 calc R . . 
H12B H 0.8795 1.5194 0.7943 0.117 Uiso 1 1 calc R . . 
H12C H 1.0260 1.4803 0.8286 0.117 Uiso 1 1 calc R . . 
C13 C 0.6927(5) 1.2604(4) 0.7838(3) 0.0714(12) Uani 1 1 d . . . 
C14 C 0.5551(5) 1.2409(5) 0.7614(3) 0.0949(19) Uani 1 1 d . . . 
H14A H 0.4707 1.2691 0.7867 0.114 Uiso 1 1 calc R . . 
C15 C 0.5421(5) 1.1808(4) 0.7028(3) 0.0839(15) Uani 1 1 d . . . 
H15A H 0.4493 1.1681 0.6890 0.101 Uiso 1 1 calc R . . 
C16 C 0.6672(4) 1.1386(3) 0.6638(2) 0.0609(10) Uani 1 1 d . . . 
C17 C 0.8033(4) 1.1552(3) 0.6881(2) 0.0595(9) Uani 1 1 d . . . 
H17A H 0.8874 1.1256 0.6635 0.071 Uiso 1 1 calc R . . 
C18 C 0.8180(4) 1.2148(3) 0.7482(2) 0.0621(10) Uani 1 1 d . . . 
H18A H 0.9104 1.2241 0.7644 0.075 Uiso 1 1 calc R . . 
C19 C 0.6525(4) 1.0771(3) 0.5984(2) 0.0550(8) Uani 1 1 d . . . 
C20 C 0.6256(5) 1.3764(3) 1.2339(2) 0.0625(10) Uani 1 1 d . . . 
C21 C 0.7348(5) 1.3248(4) 1.2726(3) 0.0696(11) Uani 1 1 d . . . 
H21A H 0.8334 1.3346 1.2590 0.084 Uiso 1 1 calc R . . 
C22 C 0.6969(5) 1.2598(3) 1.3306(3) 0.0681(11) Uani 1 1 d . . . 
H22A H 0.7704 1.2256 1.3562 0.082 Uiso 1 1 calc R . . 
C23 C 0.5500(5) 1.2439(3) 1.3518(2) 0.0582(9) Uani 1 1 d . . . 
C24 C 0.4431(5) 1.2999(3) 1.3165(2) 0.0639(10) Uani 1 1 d . . . 
H24A H 0.3446 1.2938 1.3330 0.077 Uiso 1 1 calc R . . 
C25 C 0.4795(5) 1.3657(3) 1.2563(2) 0.0678(11) Uani 1 1 d . . . 
H25A H 0.4062 1.4016 1.2318 0.081 Uiso 1 1 calc R . . 
C26 C 0.5145(5) 1.1651(3) 1.4112(2) 0.0590(9) Uani 1 1 d . . . 
C27 C 0.9082(5) 1.7988(3) 0.8421(2) 0.0603(9) Uani 1 1 d . . . 
C28 C 0.8469(5) 1.8205(4) 0.7742(3) 0.0726(12) Uani 1 1 d . . . 
H28A H 0.7589 1.7939 0.7652 0.087 Uiso 1 1 calc R . . 
C29 C 0.9135(5) 1.8804(4) 0.7199(3) 0.0695(11) Uani 1 1 d . . . 
H29A H 0.8717 1.8930 0.6741 0.083 Uiso 1 1 calc R . . 
C30 C 1.0431(4) 1.9227(3) 0.7326(2) 0.0580(9) Uani 1 1 d . . . 
C31 C 1.0996(5) 1.9052(3) 0.8023(2) 0.0628(10) Uani 1 1 d . . . 
H31A H 1.1837 1.9355 0.8126 0.075 Uiso 1 1 calc R . . 
C32 C 1.0332(5) 1.8430(3) 0.8574(2) 0.0622(10) Uani 1 1 d . . . 
H32A H 1.0729 1.8315 0.9039 0.075 Uiso 1 1 calc R . . 
C33 C 1.1227(5) 1.9802(3) 0.6716(2) 0.0588(9) Uani 1 1 d . . . 
 
loop_ 
 _atom_site_aniso_label 
 _atom_site_aniso_U_11 
 _atom_site_aniso_U_22 
 _atom_site_aniso_U_33 
 _atom_site_aniso_U_23 
 _atom_site_aniso_U_13 
 _atom_site_aniso_U_12 
Tb1 0.04635(13) 0.04837(13) 0.04036(12) -0.00493(8) -0.00147(8) -0.00658(8) 
O1 0.0646(18) 0.104(2) 0.087(2) -0.0555(19) -0.0176(16) 0.0109(17) 
O2 0.0715(19) 0.108(2) 0.0594(17) 0.0321(16) -0.0087(14) -0.0263(17) 
O3 0.0627(16) 0.0728(18) 0.0693(17) 0.0213(14) -0.0003(13) -0.0138(14) 
O4 0.0693(17) 0.0742(18) 0.0553(15) -0.0234(13) -0.0105(13) 0.0033(14) 
O5 0.0648(17) 0.0838(19) 0.0533(15) -0.0088(13) -0.0113(13) -0.0186(14) 
O6 0.085(2) 0.0575(16) 0.0653(17) 0.0088(13) -0.0061(15) 0.0020(14) 
O7 0.0731(19) 0.0661(17) 0.0618(16) 0.0086(13) 0.0086(14) -0.0060(14) 
O8 0.0787(19) 0.0740(18) 0.0584(16) -0.0066(13) 0.0120(14) -0.0258(15) 
O9 0.0563(16) 0.102(2) 0.0563(16) 0.0154(15) -0.0043(13) -0.0162(15) 
O10 0.107(3) 0.0648(18) 0.083(2) -0.0226(16) -0.0168(19) 0.0077(17) 
O11 0.0740(19) 0.0724(18) 0.0729(18) -0.0065(15) -0.0167(15) 0.0094(15) 
C1 0.058(2) 0.060(2) 0.055(2) -0.0123(17) -0.0118(17) -0.0011(17) 
C2 0.061(2) 0.052(2) 0.057(2) -0.0002(16) -0.0111(17) -0.0090(16) 
C3 0.060(2) 0.0514(19) 0.0454(18) 0.0019(15) -0.0066(16) -0.0074(16) 
C4 0.062(2) 0.0499(19) 0.0421(17) -0.0008(14) -0.0039(15) -0.0062(16) 
C5 0.061(2) 0.053(2) 0.0446(18) -0.0017(15) -0.0063(16) -0.0108(16) 
C6 0.054(2) 0.063(2) 0.0470(19) -0.0063(16) -0.0016(16) -0.0049(17) 
C7 0.065(2) 0.072(3) 0.073(3) -0.028(2) -0.016(2) 0.000(2) 
C8 0.098(4) 0.056(2) 0.087(3) -0.001(2) -0.013(3) -0.020(2) 
C9 0.064(2) 0.066(2) 0.052(2) 0.0079(17) -0.0021(17) -0.0076(18) 
C10 0.104(4) 0.060(2) 0.054(2) -0.0127(19) 0.006(2) -0.011(2) 
C11 0.068(2) 0.059(2) 0.054(2) 0.0053(17) -0.0074(18) -0.0147(18) 
C12 0.083(3) 0.093(3) 0.057(2) -0.014(2) 0.012(2) -0.011(3) 
C13 0.061(2) 0.087(3) 0.070(3) -0.036(2) -0.014(2) 0.005(2) 
C14 0.053(2) 0.142(5) 0.093(4) -0.064(4) -0.008(2) 0.009(3) 
C15 0.050(2) 0.125(4) 0.080(3) -0.051(3) -0.011(2) 0.001(2) 
C16 0.054(2) 0.076(3) 0.054(2) -0.0214(19) -0.0049(17) -0.0036(18) 
C17 0.050(2) 0.066(2) 0.064(2) -0.0190(18) -0.0061(17) 0.0008(17) 
C18 0.050(2) 0.073(3) 0.066(2) -0.024(2) -0.0098(17) 0.0001(18) 
C19 0.058(2) 0.060(2) 0.0482(19) -0.0106(16) -0.0059(17) -0.0077(17) 
C20 0.072(3) 0.067(2) 0.048(2) 0.0078(17) -0.0005(18) -0.012(2) 
C21 0.058(2) 0.082(3) 0.067(3) 0.009(2) 0.0040(19) -0.007(2) 
C22 0.064(2) 0.074(3) 0.065(2) 0.011(2) -0.003(2) 0.001(2) 
C23 0.064(2) 0.057(2) 0.053(2) -0.0011(17) 0.0015(17) -0.0024(17) 
C24 0.058(2) 0.069(2) 0.063(2) 0.0053(19) 0.0012(18) -0.0062(19) 
C25 0.061(2) 0.078(3) 0.063(2) 0.015(2) -0.0053(19) -0.004(2) 
C26 0.070(3) 0.059(2) 0.0465(19) -0.0024(16) 0.0058(18) -0.0037(19) 
C27 0.062(2) 0.059(2) 0.058(2) 0.0069(17) 0.0025(18) -0.0074(18) 
C28 0.061(2) 0.093(3) 0.066(3) 0.012(2) -0.006(2) -0.023(2) 
C29 0.063(2) 0.088(3) 0.058(2) 0.011(2) -0.0081(19) -0.013(2) 
C30 0.058(2) 0.061(2) 0.053(2) 0.0034(17) 0.0045(17) -0.0037(17) 
C31 0.064(2) 0.067(2) 0.059(2) 0.0011(18) -0.0058(19) -0.0168(19) 
C32 0.067(2) 0.069(2) 0.051(2) 0.0030(18) -0.0016(18) -0.0126(19) 
C33 0.058(2) 0.059(2) 0.058(2) 0.0063(17) -0.0004(18) -0.0039(18) 
 
_geom_special_details 
; 
 All esds (except the esd in the dihedral angle between two l.s. planes) 
 are estimated using the full covariance matrix.  The cell esds are taken 
 into account individually in the estimation of esds in distances, angles 
 and torsion angles; correlations between esds in cell parameters are only 
 used when they are defined by crystal symmetry.  An approximate (isotropic) 
 treatment of cell esds is used for estimating esds involving l.s. planes. 
; 
 
loop_ 
 _geom_bond_atom_site_label_1 
 _geom_bond_atom_site_label_2 
 _geom_bond_distance 
 _geom_bond_site_symmetry_2 
 _geom_bond_publ_flag 
Tb1 O5 2.292(3) 2_676 ? 
Tb1 O6 2.334(3) 1_554 ? 
Tb1 O4 2.378(3) . ? 
Tb1 O7 2.386(3) 2_677 ? 
Tb1 O10 2.401(3) . ? 
Tb1 O9 2.426(3) 2_786 ? 
Tb1 O11 2.460(3) . ? 
Tb1 O8 2.584(3) 2_786 ? 
Tb1 C33 2.880(4) 2_786 ? 
O1 C13 1.365(5) . ? 
O1 C7 1.433(5) . ? 
O2 C20 1.367(5) . ? 
O2 C9 1.447(5) . ? 
O3 C27 1.363(5) . ? 
O3 C11 1.444(5) . ? 
O4 C19 1.253(5) . ? 
O5 C19 1.264(5) . ? 
O5 Tb1 2.292(3) 2_676 ? 
O6 C26 1.266(5) . ? 
O6 Tb1 2.333(3) 1_556 ? 
O7 C26 1.255(5) . ? 
O7 Tb1 2.386(3) 2_677 ? 
O8 C33 1.250(5) . ? 
O8 Tb1 2.584(3) 2_786 ? 
O9 C33 1.267(5) . ? 
O9 Tb1 2.426(3) 2_786 ? 
C1 C6 1.398(6) . ? 
C1 C2 1.401(6) . ? 
C1 C7 1.503(6) . ? 
C2 C3 1.394(5) . ? 
C2 C8 1.507(6) . ? 
C3 C4 1.408(5) . ? 
C3 C9 1.506(6) . ? 
C4 C5 1.393(5) . ? 
C4 C10 1.505(5) . ? 
C5 C6 1.394(5) . ? 
C5 C11 1.516(5) . ? 
C6 C12 1.518(6) . ? 
C13 C18 1.386(6) . ? 
C13 C14 1.392(7) . ? 
C14 C15 1.367(7) . ? 
C15 C16 1.392(6) . ? 
C16 C17 1.383(6) . ? 
C16 C19 1.480(5) . ? 
C17 C18 1.387(5) . ? 
C20 C25 1.376(6) . ? 
C20 C21 1.393(6) . ? 
C21 C22 1.365(6) . ? 
C22 C23 1.392(6) . ? 
C23 C24 1.375(6) . ? 
C23 C26 1.505(6) . ? 
C24 C25 1.398(6) . ? 
C27 C32 1.375(6) . ? 
C27 C28 1.381(6) . ? 
C28 C29 1.365(6) . ? 
C29 C30 1.387(6) . ? 
C30 C31 1.381(6) . ? 
C30 C33 1.479(6) . ? 
C31 C32 1.393(6) . ? 
C33 Tb1 2.880(4) 2_786 ? 
 
loop_ 
 _geom_angle_atom_site_label_1 
 _geom_angle_atom_site_label_2 
 _geom_angle_atom_site_label_3 
 _geom_angle 
 _geom_angle_site_symmetry_1 
 _geom_angle_site_symmetry_3 
 _geom_angle_publ_flag 
O5 Tb1 O6 73.90(11) 2_676 1_554 ? 
O5 Tb1 O4 125.84(11) 2_676 . ? 
O6 Tb1 O4 75.43(11) 1_554 . ? 
O5 Tb1 O7 83.50(11) 2_676 2_677 ? 
O6 Tb1 O7 128.88(11) 1_554 2_677 ? 
O4 Tb1 O7 82.43(11) . 2_677 ? 
O5 Tb1 O10 84.49(12) 2_676 . ? 
O6 Tb1 O10 142.79(11) 1_554 . ? 
O4 Tb1 O10 140.65(11) . . ? 
O7 Tb1 O10 76.44(12) 2_677 . ? 
O5 Tb1 O9 128.44(10) 2_676 2_786 ? 
O6 Tb1 O9 74.60(12) 1_554 2_786 ? 
O4 Tb1 O9 82.94(11) . 2_786 ? 
O7 Tb1 O9 147.23(11) 2_677 2_786 ? 
O10 Tb1 O9 97.33(13) . 2_786 ? 
O5 Tb1 O11 152.62(12) 2_676 . ? 
O6 Tb1 O11 133.48(11) 1_554 . ? 
O4 Tb1 O11 70.83(10) . . ? 
O7 Tb1 O11 77.19(11) 2_677 . ? 
O10 Tb1 O11 72.31(12) . . ? 
O9 Tb1 O11 70.34(11) 2_786 . ? 
O5 Tb1 O8 81.50(10) 2_676 2_786 ? 
O6 Tb1 O8 74.96(11) 1_554 2_786 ? 
O4 Tb1 O8 130.51(10) . 2_786 ? 
O7 Tb1 O8 146.21(10) 2_677 2_786 ? 
O10 Tb1 O8 72.11(11) . 2_786 ? 
O9 Tb1 O8 51.33(10) 2_786 2_786 ? 
O11 Tb1 O8 104.18(11) . 2_786 ? 
O5 Tb1 C33 104.15(11) 2_676 2_786 ? 
O6 Tb1 C33 70.48(11) 1_554 2_786 ? 
O4 Tb1 C33 106.10(12) . 2_786 ? 
O7 Tb1 C33 160.63(11) 2_677 2_786 ? 
O10 Tb1 C33 86.48(13) . 2_786 ? 
O9 Tb1 C33 25.86(11) 2_786 2_786 ? 
O11 Tb1 C33 89.06(12) . 2_786 ? 
O8 Tb1 C33 25.71(11) 2_786 2_786 ? 
C13 O1 C7 118.3(3) . . ? 
C20 O2 C9 120.2(3) . . ? 
C27 O3 C11 117.3(3) . . ? 
C19 O4 Tb1 111.0(2) . . ? 
C19 O5 Tb1 172.8(3) . 2_676 ? 
C26 O6 Tb1 145.7(3) . 1_556 ? 
C26 O7 Tb1 128.0(3) . 2_677 ? 
C33 O8 Tb1 90.5(2) . 2_786 ? 
C33 O9 Tb1 97.5(2) . 2_786 ? 
C6 C1 C2 120.1(3) . . ? 
C6 C1 C7 120.0(4) . . ? 
C2 C1 C7 119.9(4) . . ? 
C3 C2 C1 119.7(3) . . ? 
C3 C2 C8 119.7(4) . . ? 
C1 C2 C8 120.6(4) . . ? 
C2 C3 C4 120.4(3) . . ? 
C2 C3 C9 119.8(3) . . ? 
C4 C3 C9 119.8(3) . . ? 
C5 C4 C3 119.0(3) . . ? 
C5 C4 C10 121.2(3) . . ? 
C3 C4 C10 119.7(3) . . ? 
C4 C5 C6 120.9(3) . . ? 
C4 C5 C11 120.9(3) . . ? 
C6 C5 C11 118.2(3) . . ? 
C5 C6 C1 119.6(3) . . ? 
C5 C6 C12 119.3(4) . . ? 
C1 C6 C12 121.1(4) . . ? 
O1 C7 C1 107.3(3) . . ? 
O2 C9 C3 106.1(3) . . ? 
O3 C11 C5 107.4(3) . . ? 
O1 C13 C18 125.3(4) . . ? 
O1 C13 C14 115.3(4) . . ? 
C18 C13 C14 119.4(4) . . ? 
C15 C14 C13 121.0(4) . . ? 
C14 C15 C16 120.3(4) . . ? 
C17 C16 C15 118.4(4) . . ? 
C17 C16 C19 121.6(4) . . ? 
C15 C16 C19 120.0(4) . . ? 
C16 C17 C18 121.9(4) . . ? 
C13 C18 C17 118.9(4) . . ? 
O4 C19 O5 121.4(3) . . ? 
O4 C19 C16 119.2(3) . . ? 
O5 C19 C16 119.3(4) . . ? 
O2 C20 C25 126.1(4) . . ? 
O2 C20 C21 113.8(4) . . ? 
C25 C20 C21 120.2(4) . . ? 
C22 C21 C20 120.0(4) . . ? 
C21 C22 C23 120.9(4) . . ? 
C24 C23 C22 118.5(4) . . ? 
C24 C23 C26 122.7(4) . . ? 
C22 C23 C26 118.8(4) . . ? 
C23 C24 C25 121.2(4) . . ? 
C20 C25 C24 118.9(4) . . ? 
O7 C26 O6 125.0(4) . . ? 
O7 C26 C23 119.6(4) . . ? 
O6 C26 C23 115.4(4) . . ? 
O3 C27 C32 125.0(4) . . ? 
O3 C27 C28 115.4(4) . . ? 
C32 C27 C28 119.6(4) . . ? 
C29 C28 C27 121.0(4) . . ? 
C28 C29 C30 120.5(4) . . ? 
C31 C30 C29 118.2(4) . . ? 
C31 C30 C33 121.1(4) . . ? 
C29 C30 C33 120.6(4) . . ? 
C30 C31 C32 121.4(4) . . ? 
C27 C32 C31 119.1(4) . . ? 
O8 C33 O9 119.5(4) . . ? 
O8 C33 C30 122.1(4) . . ? 
O9 C33 C30 118.3(4) . . ? 
O8 C33 Tb1 63.8(2) . 2_786 ? 
O9 C33 Tb1 56.6(2) . 2_786 ? 
C30 C33 Tb1 167.7(3) . 2_786 ? 
 
_diffrn_measured_fraction_theta_max    0.991 
_diffrn_reflns_theta_full              66.75 
_diffrn_measured_fraction_theta_full   0.991 
_refine_diff_density_max    1.805 
_refine_diff_density_min   -0.412 
_refine_diff_density_rms    0.075 

#===END
